# 1 **Genome size evolution in the diverse insect order Trichoptera**

## 2 **Authors**

3 Jacqueline Heckenhauer (jacqueline.heckenhauer@senckenberg.de)<sup>1,2\*</sup>, Paul B. Frandsen  
4 (paul\_frandsen@byu.edu)<sup>1,3,4</sup>, John S. Sproul (johnssproul@gmail.com)<sup>5,6</sup>, Zheng Li  
5 (zheng.li@austin.utexas.edu)<sup>7</sup>, Juraj Paule (juraj.paule@senckenberg.de)<sup>8</sup>, Amanda M. Larracuente  
6 (alarracu@ur.rochester.edu)<sup>5</sup>, Peter J. Maughan (jeff\_maughan@byu.edu)<sup>3</sup>, Michael S. Barker  
7 (msbarker@arizona.edu)<sup>7</sup>, Julio V. Schneider (julio.schneider@senckenberg.de)<sup>2</sup>, Russell J. Stewart  
8 (russell.stewart@utah.edu)<sup>9</sup>, Steffen U. Pauls (steffen.pauls@senckenberg.de)<sup>1,2,10</sup>

9

## 10 **Affiliations**

11 \* corresponding author

12 <sup>1</sup>LOEWE Centre for Translational Biodiversity Genomics (LOEWE-TBG), Frankfurt,  
13 Germany,

14 <sup>2</sup>Department of Terrestrial Zoology, Senckenberg Research Institute and Natural History  
15 Museum Frankfurt, Frankfurt, Germany

16 <sup>3</sup>Department of Plant & Wildlife Sciences, Brigham Young University, Provo, UT

17 <sup>4</sup>Data Science Lab, Smithsonian Institution, Washington, DC

18 <sup>5</sup>Department of Biology, University of Rochester, Rochester, NY, USA

19 <sup>6</sup>Department of Biology, University of Nebraska Omaha, Omaha, USA

20 <sup>7</sup>Department of Ecology and Evolutionary Biology, University of Arizona, Tucson, USA

21 <sup>8</sup>Department of Botany and Molecular Evolution, Senckenberg Research Institute and Natural  
22 History Museum Frankfurt, Frankfurt, Germany

23 <sup>9</sup>Department of Biomedical Engineering, University of Utah, Salt Lake City, UT

24 <sup>10</sup>Institute for Insect Biotechnology, Justus-Liebig-University, Gießen, Germany

25

26

27 **Abstract**

28 *Background:* Genome size is implicated in form, function, and ecological success of a  
29 species. Two principally different mechanisms are proposed as major drivers of eukaryotic  
30 genome evolution and diversity: Polyploidy (i.e., whole genome duplication: WGD) or  
31 smaller duplication events and bursts in the activity of repetitive elements (RE). Here, we  
32 generated *de novo* genome assemblies of 17 caddisflies covering all major lineages of  
33 Trichoptera. Using these and previously sequenced genomes, we use caddisflies as a model  
34 for understanding genome size evolution in diverse insect lineages.

35 *Results:* We detect a ~14-fold variation in genome size across the order Trichoptera. We find  
36 strong evidence that repetitive element (RE) expansions, particularly those of transposable  
37 elements (TEs), are important drivers of large caddisfly genome sizes. Using an innovative  
38 method to examine TEs associated with universal single copy orthologs (i.e., BUSCO genes),  
39 we find that TE expansions have a major impact on protein-coding gene regions, with TE-  
40 gene associations showing a linear relationship with increasing genome size. Intriguingly, we  
41 find that expanded genomes preferentially evolved in caddisfly clades with a higher  
42 ecological diversity (i.e., various feeding modes, diversification in variable, less stable  
43 environments).

44 *Conclusion:* Our findings provide a platform to test hypotheses about the potential  
45 evolutionary roles of TE activity and TE-gene associations, particularly in groups with high  
46 species, ecological, and functional diversities.

47

48 **Key words:**

49 biodiversity, *de novo* genome assembly, genomics, genomic diversity, genome duplication,  
50 genome size evolution, insects, repetitive elements, transposable elements, Trichoptera

51

52

53

## 54 **Background**

55 Genome size is a fundamental biological character. Studying its evolution may potentially  
56 lead to a better understanding of the origin and underlying processes of the myriad forms and  
57 functions of plants and animals. This diversification process remain at the core of much  
58 biological research. Given their high species, ecological and functional diversities, insects are  
59 excellent models for such research. To date 1,345 insect genome size estimates have been  
60 published (Gregory, 2005: Animal Genome Size Database: <http://www.genomesize.com>, last  
61 accessed 2021-04-30) ranging 240-fold from 69 Mbp in chironomid midges [1] to 16.5p Gbp  
62 in the mountain grasshopper *Podisma pedestris* [2]. Genome size variation relates poorly to  
63 the number of coding genes or the complexity of the organism (C-value enigma,  
64 [3],[4],[5],[6]) and evolutionary drivers of genome size variation remain a topic of ongoing  
65 debate (e.g. [7], [8], [9], [10]). Two principally different mechanisms are proposed as primary  
66 drivers of eukaryotic genome size evolution: Whole genome duplication (WGD, i.e.,  
67 polyploidy) or smaller duplication events and expansion of repetitive elements (REs, [5]).  
68 While WGD is ubiquitous in plant evolution, it has been regarded as the exception in animals  
69 [11], [12]. However, ancient WGD has been hypothesized to be an important driver of  
70 evolution of mollusks (e.g. [13]) amphibians (e.g. [14], [15], fish (e.g. [16], [17], [18]) and  
71 arthropods (e.g. [19], [20], [21]), including multiple putative ancient large-scale gene  
72 duplications within Trichoptera [22].

73 RE expansion is an important driver of genome size variation in many eukaryotic genomes  
74 [23], [24]. The two major categories of REs are tandem repeats (e.g., satellite DNA) and  
75 mobile transposable elements (TEs). TEs are classified into class I [retrotransposons:  
76 endogenous retroviruses (ERVs), related long terminal repeat (LTR) and non-LTR  
77 retrotransposons: SINEs (Short Interspersed Nuclear Elements), LINEs (Long Interspersed  
78 Nuclear Elements)] and class II elements (DNA transposons, [25]). In insects, the known

79 genomic proportion of TEs ranges from 1% in the antarctic midge *Belgica antarctica* [26] to  
80 65% in the migratory locust *Locusta migratoria* [27]. Broad-scale analysis of TE abundance  
81 in insects suggests that some order-specific signatures are present, however, major shifts in  
82 TE abundance are also common at shallow taxonomic levels [28], [29], including in  
83 Trichoptera [30]. The movement and proliferation of REs can have deleterious consequences  
84 on gene function and genome stability [31], [32], [33], [34], [35]. Moreover, repeat content  
85 and abundance can turn over rapidly even over short evolutionary time scales (reviewed in  
86 [36]). This rapid evolution has consequences for genome evolution and speciation, e.g., repeat  
87 divergence causes genetic incompatibilities between even closely related species [37].  
88 However, TEs can also be sources of genomic innovation with selective advantages for the  
89 host [38], [39], [40], [41], [42], [43] and they can contribute to global changes in gene  
90 regulatory networks [44], [45], [46]. Investigating RE dynamics in diverse clades provides a  
91 powerful lens for understanding their roles in genome function and evolution. Broadly  
92 studying of RE dynamics in species-rich groups with wide variation in RE activity is an  
93 important step towards efficiently identifying study systems at finer taxonomical scales  
94 (natural populations, species complexes, or recently diverged species) that are ideally suited  
95 to advance our understanding of molecular and evolutionary mechanisms underlying genome  
96 evolution. In addition, by taking this biodiversity genomics approach, we can develop new  
97 model systems and eventually better understand links between environmental factors, genome  
98 size evolution, adaptation, and speciation (see [47]).

99 With more than 16,500 species, caddisflies (Trichoptera) are among the most diverse of all  
100 aquatic insects [48]. Their species richness is reflective of their ecological diversity,  
101 including, e.g. microhabitat specialization, a full array of feeding modes, and diverse use of  
102 underwater silk secretions [49], [50]. An initial comparison of six caddisfly species found  
103 wide genome size variation in Trichoptera (ranging from 230 Mbp to 1.4 Gbp). In that study,

104 we hypothesized that the observed variation was correlated with caddisfly phylogeny and that  
105 TEs contributed to a suborder-specific increase of genome size [30].  
106 Here, we present a multi-faceted analysis to investigate genome size evolution in the order  
107 Trichoptera, as an example for highly diversified non-model organisms. Specifically, we (i)  
108 estimated genome size for species across the order to explore phylogenetic patterns in the  
109 distribution of genome size variation in Trichoptera and (ii) generated 17 new Trichoptera  
110 genomes to analyze, in conjunction with 9 existing genomes, the causes (WGD, TE  
111 expansions) of genome size variation in the evolution of caddisflies. Studying the genomic  
112 diversity of this highly diversified insect order adds new insights into drivers of genome size  
113 evolution with potential to shed light on how genome size is linked to form, function, and  
114 ecology.

115

## 116 **Data Description**

### 117 *Genomic resources*

118 Here, we combined long- and short-read sequencing technologies to generate 17 new *de novo*  
119 genome assemblies across a wide taxonomic range, covering all major lineages of  
120 Trichoptera. Details on sequencing coverage and assembly strategies are given in  
121 DataS1\_Sup.2, DataS1\_Sup.3, and supplementary note 3. To assess quality, we calculated  
122 assembly statistics with QUAST v5.0.2 [51], examined gene completeness with BUSCO  
123 v3.0.2 [52], [53] and screened for potential contamination with taxon-annotated GC-coverage  
124 (TAGC) plots using BlobTools v1.0 ([94], supplementary Figs. S31-S47). The new genomes  
125 are of comparable or better quality than other Trichoptera genomes previously reported in  
126 terms of BUSCO completeness and contiguity (Table 1). This study increases the number of  
127 assemblies in this order from nine to 26, nearly tripling the number of available caddisfly  
128 genomes and thus providing a valuable resource for studying genomic diversity across this  
129 ecologically diverse insect order. The annotation of these genomes predicted 6,413 to 12,927

130 proteins (Datas1\_Sup.2). Most of the annotated proteins (94.4% - 98.8%) showed significant  
131 sequence similarity to entries in the NCBI nr database. GO Distributions were similar to  
132 previously annotated caddisfly genomes, i.e. the major biological processes were cellular and  
133 metabolic processes. Catalytic activity was the largest subcategory in molecular function and  
134 the cell membrane subcategories were the largest cellular component (supplementary Figs.  
135 S1-S30). This project has been deposited at NCBI under BioProject ID: PRJNA558902. For  
136 accession numbers of individual assemblies see Table 1.

137 We downloaded existing Trichoptera genomes from GenBank  
138 (<https://www.ncbi.nlm.nih.gov/genome/>) or Lepbase (<http://download.lepbase.org/v4/>) and  
139 used these in conjunction with our newly generated genomes to analyze genome size  
140 evolution as explained in the following sections of this manuscript.

141

#### 142 *Flow cytometry*

143 In addition to genomic sequence data, we used flow cytometry to detect genome size variation  
144 across the order. Our study increased the number of species with available flow cytometry-  
145 based genome size estimates from 4 [55] to 31. Estimates were submitted to the Animal  
146 Genome Size Database (<http://www.genomesize.com>).

147

### 148 **Analysis**

#### 149 *Genome size evolution in Trichoptera*

150 Based on the genomes of six trichopteran species, Olsen et al. [30] found a 3-fold suborder-  
151 specific increase of genome size and hypothesized that genome size variation is correlated  
152 with their phylogeny. To test this hypothesis, we first reconstructed phylogenetic relationships  
153 by analyzing ~2,000 single-copy BUSCO genes from the 26 study species (Figs. 1 & 2, Fig.  
154 S48). We obtained a molecular phylogeny that was in agreement with recent phylogenetic  
155 hypotheses ([56], see supplementary note 6) and which showed that Trichoptera is divided

156 into two suborders: Annulipalpia (Figs. 1 & 2: Clade A, blue) and Integripalpia [consisting of  
157 basal Integripalpia (Fig. 1: Clade B1-3, light green) and infraorder Phryganides (Fig. 1: clade  
158 B4, dark green)]. Trichopterans use silk to build diverse underwater structures (see  
159 illustrations Fig. 1; supplementary note 6, supplementary Fig. S48). Thus, we refer to  
160 Annulipalpia as ‘fixed retreat- and net-spinners’, to Phryganides (Integripalpia) as ‘tube case-  
161 builders’, and to basal Integripalpia as ‘cocoon-builders’.

162 We used three approaches for estimating genome size across Trichoptera: *k-mer* distribution-  
163 estimates, backmapping of sequence data to available draft genomes (as described in [57]),  
164 and flow cytometry (FCM, supplementary note 7, supplementary figures S49-S72,  
165 DataS1\_Sup.7). FCM estimates can be affected by chromatin condensation, the proportion of  
166 cells in G0 to G1 phases [58], [59] and endoreplication in insect cells and tissues [60].  
167 Sequence-based estimates can be affected by repetitive elements in the genome resulting in  
168 smaller genome size estimates (e.g. [61], [55], [62]), as well as by GC-content because  
169 sequence library preparation including PCR amplification steps are associated with  
170 underrepresentation of GC and AT rich regions [63]. Bland-Altman plots (supplementary note  
171 8, Fig. S73) revealed general agreement of all three methods in our study. However, the FCM  
172 estimates were generally higher compared to the sequence-based estimates (Fig. 1,  
173 DataS1\_Sup.7) and, among all three approaches, this measure is expected to be the most  
174 accurate [8]. We observe that variation among the methods increased with genome size,  
175 indicating issues potentially caused by repeat content (see Results *Repeat dynamics*).

176 We observed large variation in genome size across the order. Genome size tends to be lower  
177 in ‘fixed retreat- and net-spinners’ and ‘cocoon-builders’ compared to ‘tube case-builders’  
178 (Fig. 1). Specifically, we observe that genome size varies ~14-fold ranging from 1C = 154  
179 Mbp in ‘cocoon-builders’ (Fig. 1, B1: Hydroptilidae) to 1C = 2129 Mbp in ‘tube case-  
180 builders’ (Fig. 1, clade B4: Limnephilidae). Of the 29 species analyzed by FCM, *Halesus*  
181 *digitatus* (Fig. 1, clade B4: Limnephilidae, Integripalpia) possessed the largest genome (1C =

182 2129 Mbp), while the genome of *Hydropsyche saxonica* (Fig. 1, clade A: Hydropsychidae,  
183 ‘fixed retreat- and net-spinners’) was the smallest (1C = 242 Mbp). Genome size estimates  
184 based on sequence-based methods (*kmer*-based and back-mapping) range from 1C = 154 -  
185 160 Mb in *Agraylea sexmaculata* (Fig. 1, clade B1: Hydroptilidae, ‘cocoon-builders’) to 1C =  
186 1238 - 1400 Mbp in *Sericostoma* sp. (Fig. 1, clade B4: Sericostomatidae, ‘tube case-  
187 builders’).

188

## 189 ***Repeat Dynamics***

### 190 *Repetitive element abundance and classification*

191 To understand the structural basis of genome size variation across the order Trichoptera we  
192 explored repetitive element (RE) content. We found that major expansions of transposable  
193 elements (TEs) contribute to larger genomes in ‘tube case-’ and some ‘cocoon-builders’, but  
194 particularly in ‘tube case-builders’ with an average of ~600 Mbp of REs compared to ~138  
195 Mbp in ‘fixed retreat- and net-spinners’ (Fig. 2 A, B). LINEs are the most abundant classified  
196 TEs in ‘cocoon-’ and ‘tube case-builders’ and comprise >154 Mb on average in ‘tube case-  
197 builders’, or an average genome proportion of 16.9% (range = 5.6–34.7%). This represents a  
198 1.8- and 2.8-fold increase in genome proportion relative to ‘cocoon-builders’ and ‘fixed  
199 retreat- and net-spinners’, respectively. The LINE abundance of >312 Mbp in *Odontocerum*  
200 *albicorne* exceeds the entire assembly lengths (152–282 Mbp) of the three smallest genome  
201 assemblies (*Hydropsyche tenuis*, *Parapsyche elsis*, and *Agraylea sexmaculata*) (Fig. 2 A, B).  
202 DNA transposons also comprise large genomic fractions in both ‘cocoon-’ and ‘tube case-  
203 builders’ (averages of 54.4 Mbp and 32.8 Mbp, respectively). However, despite containing a  
204 large number of bps, they make up a smaller fraction of total bps in the genomes of ‘cocoon-’  
205 and ‘tube case-builders’ than in ‘fixed retreat- and net-spinners’ (average genome proportion  
206 = 5.9%, 4.5%, and 11.1% in ‘tube case-builders’, ‘cocoon-builders’, and ‘fixed retreat- and  
207 net-spinners’, respectively) (Fig. 2 B), and thus cannot, by themselves, explain the larger



208 genome sizes. SINEs, LTRs, *Penelope* (grouped with “other” repeats in Fig. 2), and satDNAs  
209 show a disproportionate increase in ‘cocoon-’ and ‘tube case-builders’, however, all  
210 categories combined make up a relatively small proportion of their genomes (all less than 3%  
211 on average in Integripalpia) (Fig. 2, B). Unclassified repeats are the most abundant repeat  
212 category across all Trichoptera, and they also show disproportionate expansions in both  
213 ‘cocoon-’ and ‘case-builders’ relative to ‘fixed retreat- and net-spinners’ (Fig. 2 A, B). The  
214 general trends noted in our assembly-based analysis of REs were corroborated by our  
215 reference-free analysis of repeat abundance (Figs. S122, S123 supplementary note 10).

216

### 217 *TE age distribution analysis*

218 To test whether the observed abundance patterns of specific TEs are driven by shared ancient  
219 proliferation events or more recent/ongoing activity of the respective TEs, we analyzed TE  
220 age distribution plots. These plots allow us to visualize specific RE classes/superfamilies that  
221 account for shifts in RE composition and abundance and infer the relative timing of those  
222 shifts based on the distribution of sequence divergence within each RE category. TE age  
223 distributions showed a high abundance of recently diverged TE sequences in ‘cocoon-’ and  
224 ‘tube case-builders’, particularly in LINEs, DNA transposons, and LTRs in which the  
225 majority of TEs for a given class show 0–10% sequence divergence within copies of a given  
226 repeat (Fig. 3). This trend was particularly pronounced among ‘tube case-builders’ with  
227 several species showing high abundance of LINEs and DNA transposons with 0–5% sequence  
228 divergence (Fig. 3). This pattern suggests that the observed TE expansion is due primarily to  
229 ongoing TE activity within lineages rather than a few shared bursts of activity in ancestral  
230 lineages. This is further supported by our analysis of repeat sub-classes with age distribution  
231 plots (Fig. S124). For example, in our study, LINE abundance is often due to the expansion of  
232 different LINE subclasses even between species in the same sub-clade (e.g., compare  
233 *Lepidostoma* with *Micrasema*, *Himalopsyche* with *Glossosoma*; Fig. S124). We also find

234 evidence of shared ancient bursts of SINE activity in ‘cocoon-’ and ‘tube case-builders’,  
235 although SINEs are not an abundant repeat class in any species (avg. genomic  
236 proportion=1.9% stdev=1.7%) (Fig. S124).

237

### 238 *Associations between TE sequences and protein-coding genes*

239 During early exploration of our sequence data, we made an unexpected discovery that in some  
240 lineages, universal single copy orthologs or “BUSCO genes”, showed higher than expected  
241 coverage depth of mapped reads in one or more of their sequence fragments. Further analysis  
242 showed that these high coverage BUSCO sequence regions are typically RE sequences  
243 (primarily TEs) that are either embedded within or located immediately adjacent to BUSCO  
244 genes, such that the BUSCO algorithm includes them in its annotation of a given gene. We  
245 refer to BUSCO genes containing these putative RE fragments as ‘TE-associated BUSCOs’  
246 (supplementary Fig. S125, supplementary note 11). By estimating how many times they  
247 occur, we can quantitatively measure how TE-gene interactions change with changing  
248 genome size. In fact, we detected a positive linear relationship between TE-gene interactions  
249 and increasing genome size when measured with this accidentally discovered metric. We found  
250 major expansions of TE-associated BUSCOs in ‘cocoon-’ and ‘tube case-builders’ (Fig. 4A)  
251 that are significantly correlated with total repeat abundance, as well as the genomic proportion  
252 of LINEs and DNA transposons (supplementary Fig. S126). TE-associated BUSCOs  
253 comprise a relatively large fraction of total BUSCO genes in these lineages (averages of  
254 11.2% and 21.4% of total BUSCOs in ‘cocoon-’ and ‘tube case-builders’, respectively),  
255 compared to annulipalpi lineages (avg = 6.2%). This finding highlights the major impact of  
256 REs on the composition of protein-coding genes in species with repeat-rich genomes. The  
257 BUSCO-associated sequences may represent TEs recently inserted into BUSCO genes, the  
258 remnants left behind following historical TE transposition events, or TE sequences that are  
259 immediately adjacent to and inadvertently classified as BUSCO sequences.

260 To confirm that unexpectedly high-coverage sequence regions in TE-associated BUSCOs  
261 were in fact TE-derived sequences, we compared patterns of BUSCO gene structure (though  
262 pairwise alignment) across species pairs in which high-coverage regions (i.e., putative TE  
263 sequences) were present in the BUSCO gene of one species (i.e., the “inflated” species), but  
264 absent in the homologous BUSCO of the other (i.e., the “reference” species). This analysis  
265 showed that in 73 of 75 randomly sampled alignments, reference species showed gaps or  
266 highly non-contiguous alignments in high-coverage regions of the inflated species (Fig. 4B),  
267 suggesting that sequence insertions are typically present in high-coverage sequence regions of  
268 TE-associated BUSCOs. Our subsequent BLAST analysis showed that comparing a TE-  
269 associated BUSCO against its own assembly produced thousands-millions of BLAST hits  
270 from many contigs (Fig. 4C). This confirmed that the indel sequence present in high-coverage  
271 regions of “inflated” species show high sequence similarity to repetitive elements elsewhere  
272 in the genome. We then used an intersect analysis on the BLAST results to confirm that the  
273 large majority of the excessive BLAST hits overlap with RE annotations throughout the  
274 genome, most of which are TEs with LINEs and DNA transposons being most abundant (Fig.  
275 4D, DataS2\_Sup.5). Finally, we found that if we replaced the TE-associated BLAST query  
276 sequence with the homologous, but non-TE associated BUSCO from its counterpart reference  
277 species, the number of BLAST hits was fewer (Fig. 4C, DataS2\_Sup.6), offering further  
278 evidence that the TE sequence insertions driving the pattern of high-coverage in read mapping  
279 excessive BLAST hits are absent in reference species and thus carriable across relatively short  
280 time scales within Trichoptera. Taken together, these findings provide strong evidence that  
281 TE sequences (especially LINEs and DNA transposons) inadvertently annotated by BUSCO  
282 can account for the high-coverage regions we observe in BUSCO genes (Fig. 4D).

283 Our accidental discovery that quantifying the frequency of TE-associated BUSCOs can serve  
284 as an estimate of TE-gene associations may prove useful in other systems given the wide use

285 of BUSCO analysis in genomic studies. Finer details supporting the TE-gene association  
286 analysis are reported in supplementary note 11.

287

288

289

### 290 ***Gene and genome duplications***

291 Recently, a transcriptome-based study found evidence for putative ancient gene and genome  
292 duplications in hexapods, including potential WGD events in caddisflies [22], suggesting that  
293 duplication events could be responsible for some genome size variation in Trichoptera. We  
294 investigated whether this pattern persists with whole genome data and found that the age  
295 distribution of duplications in 18 genomes were significantly different compared to the  
296 background rate of gene duplication (Figs. S137 & S138). To identify if any significant peak  
297 is consistent with a potential WGD, we used mixture modeling to identify peaks in these gene  
298 age distributions, which recovered no obvious peak consistent with an ancient WGD. To  
299 further investigate potential WGD, we used Smudgeplot [64] to visualize the haplotype  
300 structure and to estimate ploidy of the genomes.

301 While Smudgeplot predicted most of the genomes to be diploid, four genomes with rather  
302 small genome sizes (230 Mb – 650 Mbp) were predicted to be tetraploid (*Hydropsyche tenuis*,  
303 *Rhyacophila evoluta* RSS1 and HR1, *Parapsyche elsis*). However, the Genomescope 2 results  
304 indicate that these are highly homozygous samples. Low heterozygosity is a known  
305 confounder of smudgeplot analyses (see  
306 <https://github.com/KamilSJaron/smudgeplot/wiki/tutorial-strawberry>) because it inflates the  
307 signal of duplication when compared to the low level of heterozygosity. We therefore  
308 interpret these four putative polyploids as artifacts of low heterozygosity in the analysis.

309

### 310 **Discussion**

311 The drivers and evolutionary consequences of genome size evolution are a topic of ongoing  
312 debate. Several models have been proposed [8]. Some hypothesize genome size to be a  
313 (mal)adaptive trait by impacting phenotypic traits such as developmental/life history, body  
314 size and other cell-size related effects [65], [66], [67], [68] reviewed in [8]. On the other hand,  
315 neutral theories suggest that DNA accumulation occurs only by genetic drift without selective  
316 pressures playing a major role in the accumulation or loss of DNA [the mutational hazard  
317 hypothesis (MHH, [23]) and the mutational equilibrium hypothesis (MEH, [24])]. The MHH  
318 only allows for small deleterious effects for the accumulation of extra DNA which is  
319 accompanied by higher mutation rates in larger genomes [23], while the MEH focuses on the  
320 balance between insertions and deletions. It suggests that genome expansions arise by ‘bursts’  
321 of duplication events or TE activity and genome shrinkage may be caused by a more constant  
322 rate of small deletions [24].

323 In this study, we observe that genome size varies ~14-fold across the order Trichoptera, with  
324 lower genome size estimates in ‘fixed retreat- and net-spinners’ and ‘cocoon-builders’  
325 compared to ‘tube case-builders’ and explore potential drivers of genome size evolution.  
326 Although, recent genomic studies have shown evidence of bursts of gene duplication and gene  
327 family expansion during the evolution of hexapods [22], [69] the presence of ancient genome  
328 duplication events are still a subject of debate [70], [71], [72]. We found neither evidence for  
329 whole duplication events when computing haplotype structure and ploidy with Smudgeplot,  
330 nor evidence of ancient WGD in the gene age distribution in our Trichoptera genomes  
331 although we recognize that some of our current genome assemblies might be too fragmented  
332 to infer synteny. This does not mean that we can rule out that duplication events played a role  
333 in genome size evolution in Trichoptera in the past. The emergence of PacBio HiFi genomes  
334 of caddisflies (e.g., Darwin Tree of Life is currently planning to sequence 28 caddisfly  
335 genomes; <https://www.darwintreeoflife.org/>) will allow a deeper exploration of putative  
336 ancient duplication events in Trichoptera.

337 We found evidence that TE expansions (especially LINES) were important drivers of genome  
338 size evolution in Trichoptera (Fig. 2, Figs. S122 & S123), which is consistent with the  
339 mutational equilibrium hypothesis (MEH). The TE age distribution analyses suggested that  
340 the high abundance of LINES was due to ongoing/recent activity occurring independently  
341 across ‘cocoon-’ and particularly ‘tube case-builders’ (Fig. 3, Fig. S124). Thus, the shift to  
342 large genomes in these lineages does not appear to be due to a single (or few) shared ancient  
343 events, rather they maintained dynamic turnover in composition of their large genomes.  
344 Mutational bias affecting pathways tied to TE-regulation may affect insertion/deletion ratios  
345 and subsequently lead to lineage-specific shifts in genome size equilibrium [73]. Such  
346 changes may be stochastic (e.g., due to drift), or linked to traits that evolve on independent  
347 trajectories as lineages diverge and are thereby constrained by phylogeny. Ecological factors,  
348 demographic history, and effective population size can further impact mutation rates. For  
349 example, environmental stress can trigger bursts of TE activity and elevated mutation rates  
350 [74], [75], [76] driving lineages that occupy niche space with frequent exposure to  
351 environmental stress toward increased TE loads and larger genomes. Similarly, lineages with  
352 small effective population sizes or which are prone to population bottlenecks may have higher  
353 mutation rates and/or reduced efficacy of natural selection which would otherwise purge  
354 mildly deleterious TE load.

355 Although our study is not designed to pinpoint specific forces maintaining large genomes in  
356 some lineages, the pattern we observe in the distribution of genome size (i.e. lower genome  
357 size estimates in ‘fixed retreat- and net-spinners’ and ‘cocoon-builders’ compared to ‘tube  
358 case-builders’) leads us to hypothesize that ecological factors may play a role in genome size  
359 evolution in the order. The three focal groups discussed here exhibit markedly different  
360 ecological strategies. Larvae of ‘fixed retreat- and net-spinners’ generally occupy relatively  
361 narrow niche space in oxygen-rich flowing-water (mostly stream/river) environments where  
362 they rely on water currents to bring food materials to their filter nets. The evolutionary

363 innovation of tube-case making is thought to have enabled ‘tube case-builders’ to occupy a  
364 much greater diversity of ecological niche space by allowing them to obtain oxygen in lentic  
365 (e.g., pond, lake, marsh) environments which are much more variable in temperature and  
366 oxygen availability than lotic environments [77], [78]. This environmental instability is  
367 greater over short (daily, seasonal) and long-time scales (centuries, millennia) [79]. It is thus  
368 plausible these tube case-building lineages experience greater environmental stress and less  
369 stable population demographics that could lead to both more frequent TE bursts and reduced  
370 efficacy of natural selection in purging deleterious effects of TE expansions as described  
371 above [23], [24].

372 We show that TE expansions (especially LINEs and DNA transposons) in ‘cocoon-’ and ‘tube  
373 case-builders’ have a major impact on protein-coding gene regions (Fig. 4). These TE-gene  
374 associations show a linear relationship with increasing genome size. This trend is particularly  
375 pronounced among ‘tube case-builders’ in which TE-associated BUSCOs comprise an  
376 average of 21.4% of total BUSCO genes (compared to 6.2% in annulipalprians). This finding  
377 corroborates other studies highlighting the role of TEs as drivers of rapid genome evolution  
378 [80], [81], [82], [83] and highlights their impact on genomic regions that have potential  
379 effects on phenotypes. Questions remain as to what evolutionary roles such changes in genic  
380 regions may play. In general, TE insertions are considered to have deleterious effects on their  
381 host’s fitness activity [84], [85]. They are known to “interrupt” genes [33], pose a risk of  
382 ectopic recombination that can lead to genome rearrangements [34], [31], [86], and have  
383 epigenetic effects on neighboring sequences [87], [88]. Therefore, purifying selection keeps  
384 TEs at low frequencies [33]. However, there is growing evidence that TE activity can also be  
385 a critical source of new genetic variation driving diversification via chromosomal  
386 rearrangements and transposition events which can result in mutations [89], including  
387 examples, of co-option [90], e.g. recent research in mammals has shown that DNA transposon

388 fragments can be co-opted to form regulatory networks with genome-wide effects on gene  
389 expression [44].

390 Ecological correlates with genome size are widely discussed in other taxa [91], [92], [93],  
391 [94], [95]. Caddisflies and other diverse insect lineages that feature various microhabitat  
392 specializations, feeding modes, and/or the use of silk represent evolutionary replicates with  
393 contrasting traits and dynamic genome size evolution. They thus have high potential as  
394 models for understanding links between ecology and the evolution of REs, genomes, and  
395 phenotypes. Our study lays a foundation for future work in caddisflies that investigates the  
396 potential impact of TE expansions on phenotypes and tests for evidence of co-option/adaptive  
397 impacts of TE-rich genomes against a null of neutral or slightly deleterious effects.

398

### 399 **Potential implications**

400 Many open questions remain as to the causes and consequences of genome size evolution. As  
401 we move forward in an era where genome assemblies are attainable for historically intractable  
402 organisms (e.g. due to constraints given large genome sizes, tissue limitations, no close  
403 reference available) we can leverage new model systems spanning a greater diversity of life to  
404 understand how genomes evolve. Here, we provide genomic resources and new genome size  
405 estimates across lineages of an underrepresented insect order that spans major variation in  
406 genome size. These data allowed us to study genome size evolution in a phylogenetic  
407 framework to reveal lineage-specific patterns in which genome size correlates strongly with  
408 phylogeny and ecological characteristics within lineages. We find that large genomes  
409 dominate lineages with a wider range of ecological variation, and that ongoing recent TE  
410 activity appears to maintain large genomes in these lineages. This leads us to hypothesize that  
411 ecological factors may be linked to genome size evolution in this group. The future directions  
412 spawned by our findings highlight the potential for using Trichoptera and other diverse insect



413 groups to understand the link between ecological and genomic diversity, a link that has been  
414 challenging to study with past models [8].

415 We also show that TE expansions are associated with increasing genome size and have an  
416 impact on protein-coding regions. These impacts have been greatest in the most species-rich  
417 and ecologically diverse caddisfly clades. While TEs are generally considered to have  
418 deleterious effects on their host's fitness activity, their roles can also be neutral or even  
419 adaptive. TE activity can be a critical source of new genetic variation and thus an important  
420 driver for diversification. Caddisflies and potentially other non-model insect groups are  
421 excellent models to test these contrasting hypotheses, as well as the potential impact of TEs  
422 on phenotypes. Using these models, especially with respect to the increasing emergence of  
423 high-quality insect genomes [96], will allow researchers to identify recurring patterns in TE  
424 dynamics and investigate their evolutionary implications across diverse clades.

425

## 426 **Methods**

427

### 428 **DNA extraction, library preparation, sequencing, and sequence read processing**

429 We extracted high molecular weight genomic DNA (gDNA) from 17 individuals (15 species)  
430 of caddisfly larvae (for sampling information, see DataS1\_Sup.1) after removing the intestinal  
431 tracts using a salting-out protocol adapted from [97] as described in supplementary note 1.  
432 We generated gDNA libraries for a low-cost high-contiguity sequencing strategy, i.e.  
433 employing a combination of short (Illumina) and long read (Nanopore or PacBio)  
434 technologies as described in supplementary notes 2. For details on sequencing coverage for  
435 each specimen see DataS1\_Sup.3.

436

### 437 ***De novo* genome assembly, annotation and quality assessment**

438 We applied different assembly strategies for different datasets. First, we applied a long-read  
439 assembly method using wtdbg2 v2.4 [98] with subsequent short-read polishing with Pilon  
440 v1.22 [99] as this method revealed good results in previous *de novo* assemblies in caddisflies  
441 [55]. In cases where this pipeline did not meet the expected quality regarding contiguity and  
442 BUSCO completeness, we applied *de novo* hybrid assembly approaches of MaSuRCA v.3.1.1  
443 [100] (supplementary note 3). Illumina-only data was assembled with SPAdes [101] explained  
444 in supplementary note 3. Prior to annotating the individual genomes with MAKER2 v2.31.10  
445 [102], [103] we used RepeatModeler v2.0 and RepeatMasker v4.1.0, to identify species-  
446 specific repetitive elements in each of the assemblies, relative to RepBase libraries  
447 v20181026; [www.girinst.org](http://www.girinst.org)). Transcriptome evidence for the annotation of the individual  
448 genomes included their species-specific or closely related *de novo* transcriptome provided by  
449 1KITE (<http://www.1kite.org/>; last accessed November 11, 2019, DataS1\_Sup.9) or  
450 downloaded from Genbank as well as the cDNA and protein models from *Stenopsyche*  
451 *tienmushanensis* [104] and *Bombyx mori* (AR102, GenBank accession ID#  
452 GCF\_000151625.1). Additional protein evidence included the uniprot-sprot database  
453 (downloaded September 25, 2018). We masked repeats based on species-specific files  
454 produced by RepeatModeler. For *ab initio* gene prediction, species specific AUGUSTUS gene  
455 prediction models as well as *Bombyx mori* SNAP gene models were provided to MAKER.  
456 The EvidenceModeler [105] and tRNAscan [106] options in MAKER were employed to  
457 produce a weighted consensus gene structure and to identify tRNAs genes. MAKER default  
458 options were utilized for BLASTN, BLASTX, TBLASTX searches. Two assemblies  
459 (*Agapetus fuscipens* GL3 and *Micrasema longulum* ML1) were not annotated because of their  
460 low contiguity. All protein sequences were assigned putative names by BlastP Protein–Protein  
461 BLAST 2.2.30+ searches [107] and were functionally annotated using command line  
462 Blast2Go v1.3.3 [108], see supplementary note 4, Figs. S1-S30).

463 We calculated assembly statistics with QUAST v5.0.2 [51] and examined completeness with  
464 BUSCO v3.0.2 [52], [53] using the Endopterygota odb9 dataset with the options `--long, -m =`  
465 `genome` and `-sp= fly`. A summary of the assembly statistics and BUSCO completeness is  
466 given in Table 1. The final genome assemblies and annotations were screened and filtered for  
467 potential contaminations with taxon-annotated GC-coverage (TAGC) plots using BlobTools  
468 v1.0 [54]. Details and blobplots are given in supplementary note 5 & supplementary Figs.  
469 S31-S47.

470

### 471 **Species tree reconstruction**

472 We used the single-copy orthologs resulting from the BUSCO analyses to generate a species  
473 tree. We first combined single-copy ortholog amino acid files from each species into a single  
474 FASTA for each ortholog. We then aligned them with the MAFFT L-INS-i algorithm [109].  
475 We selected amino acid substitution models for each ortholog using ModelFinder (option `-m`  
476 `mfp`, [110] in IQtree v.2.0.6 [111] and estimated a maximum likelihood tree with 1000  
477 ultrafast bootstrap replicates [112] with the BNNI correction (option `-bb 1000 -bnni`). We  
478 combined the best maximum likelihood tree from each gene for species tree analysis in  
479 ASTRAL-III [113]. A locus tree was inferred using the alignment file (`-s`) and the partition  
480 file (`-S`) with the settings `-prefix loci` and `-T AUTO` in IQtree. Gene and site concordance  
481 factors were calculated with IQTree using the species tree (`-t`), the locus tree (`--gcf`) and the  
482 alignment file (`-s`) with 100 quartets for computing the site concordance factors (`--scf 100`)  
483 and `--prefix concord` for computing the gene concordance factors. We visualized the trees  
484 using FigTree v.1.4.4 (<http://tree.bio.ed.ac.uk/software/figtree/>).

485

### 486 **Genome size estimations and genome profiling**

487 Genome size estimates of 27 species were conducted using flow cytometry (FCM) according  
488 to Otto [114] using *Lycopersicon esculentum* cv. Stupické polnítyčkové rané

489 (2C<sub>0</sub>=1.96 pg;[115]) as internal standard and propidium iodine as stain. Additionally, we  
490 used trimmed, contamination filtered short-read data (see supplementary note 2) to conduct  
491 genome profiling (estimation of major genome characteristics such as size, heterozygosity,  
492 and repetitiveness) using a *k-mer* distribution-based method (GenomeScope 2.0, [64].  
493 Genome scope profiles are available online (see links to Genomescope 2 in DataS1\_Sup.4). In  
494 addition, we applied a second sequencing-based method for genome size estimates, which  
495 uses the backmapping rate of sequenced reads to the assembly and coverage distribution  
496 (backmap.pl v0.1, [57]). Details of all three methods are described in supplementary note 7.  
497 Coverage distribution per position and genome size estimate from backmap.pl are shown in  
498 Figs. S49-72). We assessed the congruence among the three quantitative methods of  
499 measurement (Genomescope2, Backmap.pl and FCM) with Bland-Altman-Plots using the  
500 function `BlandAltmanLeh::bland.altman.plot` in `ggplot2` [116] in RStudio (RStudio Team  
501 (2020). RStudio: Integrated Development for R. RStudio, PBC, Boston, MA URL  
502 <http://www.rstudio.com/>; supplementary note 8, Fig. S73).

503

## 504 **Repeat dynamics**

### 505 *Repeat abundance and classification*

506 We identified and classified repetitive elements in the genome assemblies of each species  
507 using RepeatModeler2.0 [117]. We annotated repeats in the contamination filtered assemblies  
508 with RepeatMasker 4.1.0 (<http://www.repeatmasker.org>) using the custom repeat libraries  
509 generated from RepeatModeler2 for each respective assembly with the search engine set to  
510 “ncbi” and using the `-xsmall` option. We converted the softmasked assembly resulting from  
511 the first RepeatMasker round into a hardmasked assembly using the `lc2n.py` script  
512 (<https://github.com/PdomGenomeProject/repeat-masking>). Finally, we re-ran RepeatMasker  
513 on the hard-masked genome with RepeatMasker’s internal arthropod repeat library using `-`  
514 species “Arthropoda”. We then merged RepeatMasker output tables from both runs by parsing

515 them with a script (RM\_table\_parser\_families\_.py, available at  
516 [https://github.com/jhcaddisfly/TE-gene\\_intersect\\_analysis](https://github.com/jhcaddisfly/TE-gene_intersect_analysis)) and then combined the resulting  
517 data columns for the two runs in Excel.

518 We also estimated repetitive element abundance and composition using  
519 RepeatExplorer2[118], [119] and dnaPipeTE v.1.3.1 [120]. These reference-free approaches  
520 quantifies repeats directly from unassembled short-read data. These analyses allowed us to  
521 test for general consistency of patterns with our assembly-based approach described above,  
522 and to test for the presence of abundant repeat categories such as satellite DNAs which can  
523 comprise large fractions of genomes yet can be prone to poor representation in the genome  
524 assembly. Prior to analysis, we normalized contamination filtered (see supplementary note 2)  
525 input data sets to 0.5x coverage using RepeatProfiler [121] and seqtk  
526 (<https://github.com/lh3/seqtk>), and then ran RepeatExplorer2 clustering with the Metazoa 3.0  
527 database specified for annotation (supplementary Fig. S122) and dnaPipeTE with the -RM\_lib  
528 flag set to the Repbase v20170127 repeat library (supplementary Fig. S123).

529

### 530 *TE age distribution analysis*

531 We further characterized repetitive element dynamics in Trichoptera by analyzing TE  
532 landscapes, which show relative age differences among TE sequences and their genomic  
533 abundance. We used these analyses to test whether abundance patterns of specific TEs are  
534 driven by shared ancient proliferation events or more recent/ongoing activity of the respective  
535 TEs. For example, if shared ancient proliferation is driving abundance patterns of a given TE,  
536 the majority of its copies would show moderate to high sequence divergence (e.g., >10%  
537 pairwise divergence). In contrast, if abundance patterns are driven by recent/ongoing activity  
538 of a given TE, we would expect the majority of its sequences to show low sequence  
539 divergence (e.g., 0–10%). We generated TE age distribution plots using dnaPipeTE v1.3.1

540 [120] with genomic coverage for each species sampled to 0.5X prior to analysis and the -  
541 RM\_lib flag set to the Repbase v20170127 repeat library (supplementary Fig. S124).

542

### 543 *TE sequence associations with protein-coding genes*

544 We analyzed BUSCO genes for all species to quantify the abundance of TE-associated  
545 BUSCOs across samples and investigated associations between TEs and genic sequences in  
546 Trichoptera lineages by quantifying the abundance of TE-associated BUSCO genes (for  
547 presence and absence of TE-associated BUSCOs see Fig. S125, DataS2\_Sup.3). This analysis  
548 also allowed us to quantify shifts in associations between TEs and genic regions across  
549 Trichoptera lineages with varying repeat abundance. We identified BUSCO genes with high-  
550 coverage sequence regions based on coverage profiles and quantified their genomic  
551 abundance by using each TE-associated BUSCO as a query in a BLAST search against their  
552 respective genome assembly. We then conducted intersect analysis for all unique BUSCO hits  
553 from high coverage sequences to determine if these were annotated as TEs. We calculated the  
554 total number of bases in filtered BLAST after subtracting the number of bases at the locus  
555 belonging to all ‘complete’ BUSCO genes and categorized high coverage sequence regions in  
556 BUSCO genes based on their annotation status and repeat classification using custom scripts  
557 (available at [https://github.com/jhcaddisfly/TE-gene\\_intersect\\_analysis](https://github.com/jhcaddisfly/TE-gene_intersect_analysis)). We plotted  
558 the number of the high coverage BUSCO sequence regions belonging to repetitive element  
559 categories (i.e., classes and subclasses) alongside plots of the relative genomic abundance of  
560 each respective category. In addition, we investigated BUSCO genes with regions of high  
561 coverage by pairwise alignments. Specifically, we visualized alignments of BUSCOs with  
562 high coverage sequence regions (i.e., the “inflated species”) alongside orthologous BUSCOs  
563 that lack such regions taken from closely related species (i.e., the “reference” species). We  
564 further tested this prediction by taking the set of BUSCOs that only exhibited high coverage

565 regions in the inflated species and contrasted results of two BLAST searches followed by an  
566 intersect analysis. A detailed description of this method is provided in supplementary note 11.

567

## 568 **Gene and Genome duplications**

### 569 *Inference of WGDs from gene age distributions*

570 To recover signal from potential WGDs, for each genome, we used the DupPipe pipeline to  
571 construct gene families and estimate the age distribution of gene duplications [122],  
572 <https://bitbucket.org/barkerlab/evopipes/src/master/>). We translated DNA sequences and  
573 identified ORFs by comparing the Genewise [123] alignment to the best-hit protein from a  
574 collection of proteins from 24 metazoan genomes from Metazome v3.0. For all DupPipe runs,  
575 we used protein-guided DNA alignments to align our nucleic acid sequences while  
576 maintaining the ORFs. We estimated synonymous divergence ( $K_s$ ) using PAML with the  
577 F3X4 model [124] for each node in the gene family phylogenies. We first identified taxa with  
578 potential WGDs by comparing their paralog ages to a simulated null distribution without  
579 ancient WGDs using a K-S goodness-of-fit test [125]. We then used mixture modeling to  
580 identify if any significant peaks consistent with a potential WGD and to estimate their median  
581 paralog  $K_s$  values. Significant peaks were identified using a likelihood ratio test in the  
582 `boot.comp` function of the package `mixtools` in R [126].

583

### 584 *Visualization of genome structure to estimate ploidy using smudgeplots*

585 We visualized the genome structure and estimated ploidy levels with `smudgeplot`. For this  
586 purpose, we extracted genomic kmers from kmer counts produced with `jellyfish` (as described  
587 above in “Genome size estimation and genome profiling”) using “`jellyfish dump`” with  
588 coverage thresholds previously estimated from kmer histograms using the `smudgeplot.py`  
589 script. We computed the set of kmer pairs with the `Smudgeplot` tool `hetkmers`. After  
590 generating the list of kmer pair coverages, we generated `smudgeplots` using the coverage of

591 the kmer pairs and the “plot” tool within Smudgeplot. Ploidy as well as the haploid kmer  
 592 coverage was estimated directly from the data and compared to the estimates reported by  
 593 Genomescope2 (see DataS1-Sup.4). Details of the method and smudgeplots are given in  
 594 supplementary figures S74-121.

595

## 596 Figures

Figure 1

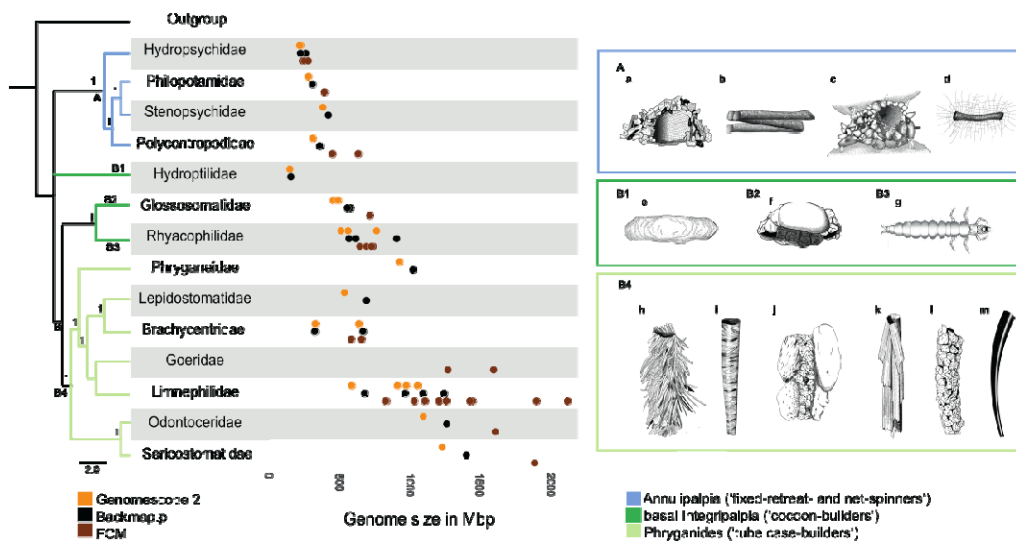

597

598 **Fig. 1: Ecological diversity (right) and genome size (left) in caddisflies.** Phylogenetic relationships  
 599 derived from ASTRAL-III analyses using single BUSCO genes. Goeridae, which was not included in  
 600 the BUSCO gene set, was placed according to [56]. ASTRAL support values (local posterior  
 601 probabilities) higher than 0.9 are given for each node. The placement of Hydroptilidae (clade B1) was  
 602 ambiguous. Since its placement was poorly supported in our analyses, we placed it according to  
 603 Thomas et al. [56]. Taxa were collapsed to family level. Trichoptera are divided into two suborders:  
 604 Annu ipalpia (‘fixed retreat- and net-spinners’, clade A: blue) and Integripalpia (clade B: green)  
 605 which includes basal Integripalpia (‘cocoon-builders’, clades B1-B3, dark green) and Phryganides or  
 606 ‘tube case-builders’ (clade B4: light green). ‘Cocoon-builders’ are divided into ‘purse case’- (clade  
 607 B1), ‘tortoise case-building’ (clade B2) and ‘free-living’ (clade B3) families. Genome size estimates  
 608 based on different methods (Genomescope2: orange, Backmap.pl: black, Flow Cytometry (FCM):  
 609 brown) are given for various caddisfly families. Each dot corresponds to a mean estimate of a species.  
 610 For detailed information on the species and number of individuals used in each method see Data  
 611 S1\_Sup.7 -Genome size - Summary. Colors and clade numbers in the phylogenetic tree refer to  
 612 colored boxes with illustrations. The following species are illustrated by Ralph Holzenthal: a:



613 *Hydropsyche* sp. (Hydropsychidae); b: *Chimarra* sp. (Philopotamidae); c: *Stenopsyche* sp.  
 614 (Stenopsychidae); d: *Polycentropus* sp. (Polycentropodidae); e: *Agraylea* sp. (Hydroptilidae); f:  
 615 *Glossosoma* sp. (Glossosomatidae); g: *Rhyacophila* sp. (Rhyacophilidae); h: *Fabria inornata*  
 616 (Phryganeidae); i: *Micrasema* sp. (Brachycentridae); j: *Goera fuscata* (Goeridae); k: *Sphagnophylax*  
 617 *meiops* (Limnephilidae); l: *Psilotreta* sp. (Odontoceridae); m: *Grumicha grumicha* (Sericostomatidae).  
 618

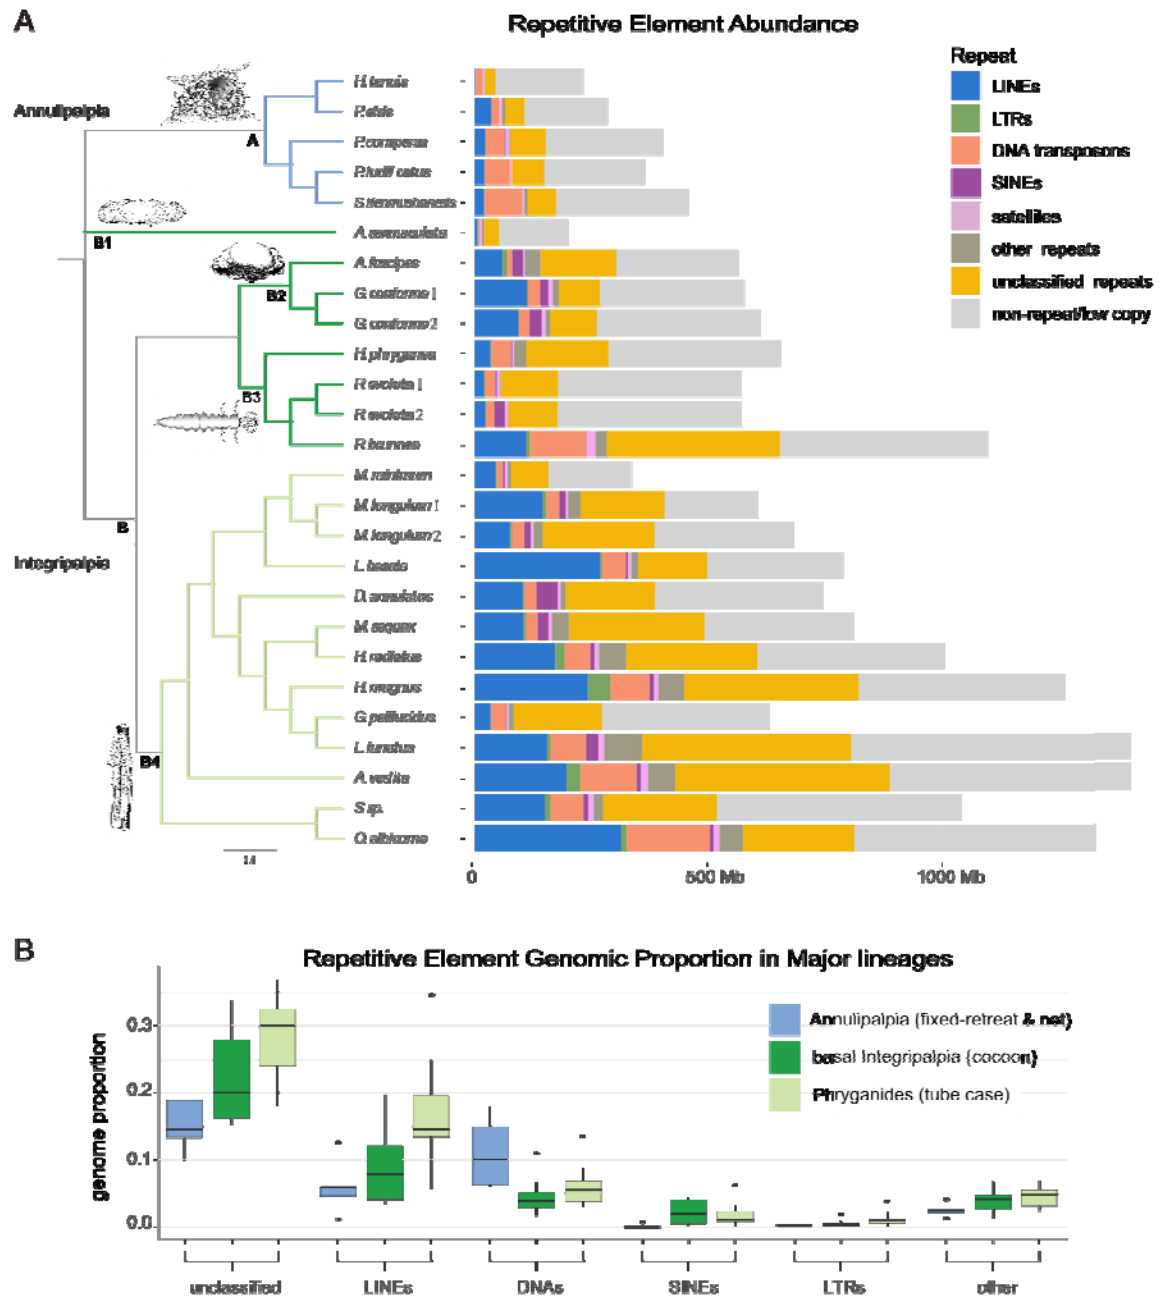

623 placement of Hydroptilidae (clade B1) was ambiguous. Since its placement was poorly supported in  
 624 our analyses, we placed the single hydroptilid taxon (*Agraylea sexmaculata*) according to Thomas et  
 625 al. [56]. Species names corresponding to the abbreviations in the tree can be found in Table 1.  
 626 Trichoptera are divided into two suborders: Annulipalpia ('fixed retreat- and net-spinners', clade A:  
 627 blue) and Intergripalpia (clade B: green) which includes basal Integripalpia ('cocoon-builders', clades  
 628 B1-B3, dark green) and Phryganides or 'tube case-builders' (clade B4: light green). 'Cocoon-builders'  
 629 are divided into 'purse case'- (clade B1), 'tortoise case-building' (clade B2) and 'free-living' (clade  
 630 B3) families. An illustration of a representative of each clade is given. The "other\_repeats" category  
 631 includes: rolling-circles, *Penelope*, low-complexity, simple repeats, and small RNAs. B: Boxplots  
 632 summarizing shifts in the genomic proportion of RE categories in major Trichoptera lineages.

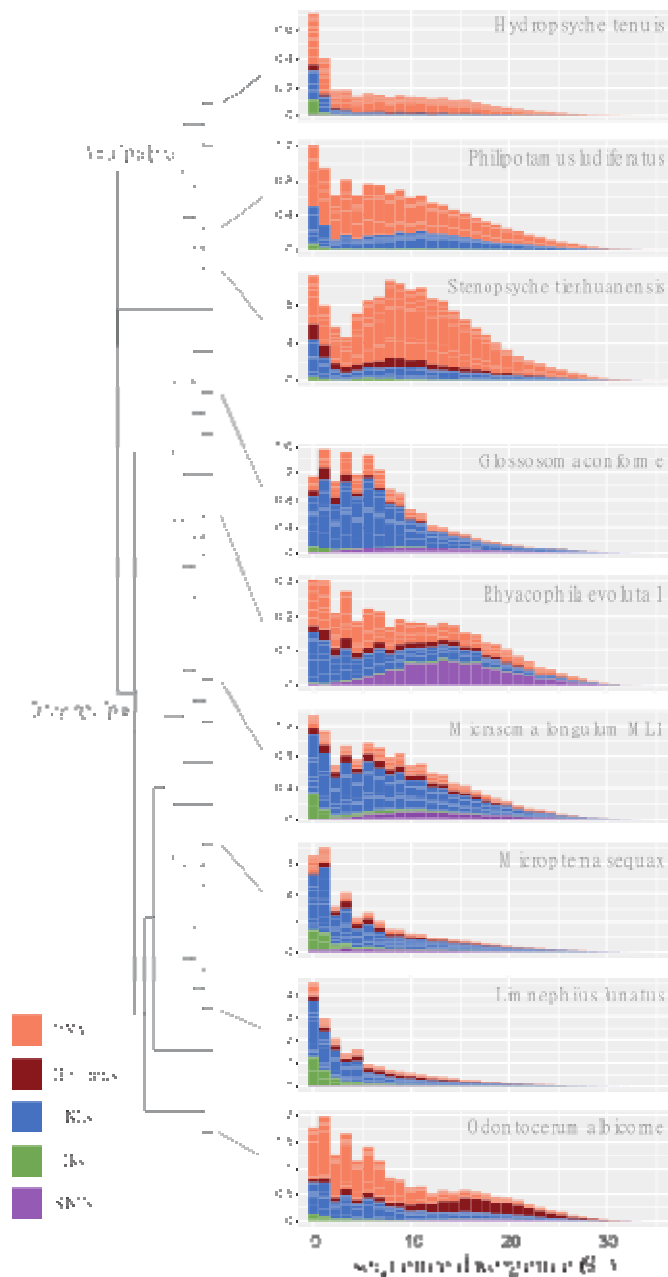

634 **Fig. 3: Transposable element age distribution landscapes.** Representative examples are chosen  
 635 from major Trichoptera lineages. The y-axis shows TE abundance as a proportion of the genome (e.g.,  
 636 1.0 = 1% of the genome). The x-axis shows sequence divergence relative to TE consensus sequences  
 637 for major TE classes. TE classes with abundance skewed toward the left (i.e., low sequence  
 638 divergence) are inferred to have a recent history of diversification relative to TE classes with right-  
 639 skewed abundance. Plots were generated in dnaPipeTE. Plots for all species are shown in  
 640 supplementary Fig. S123. For tip labels of the phylogenetic tree see Fig. 2.

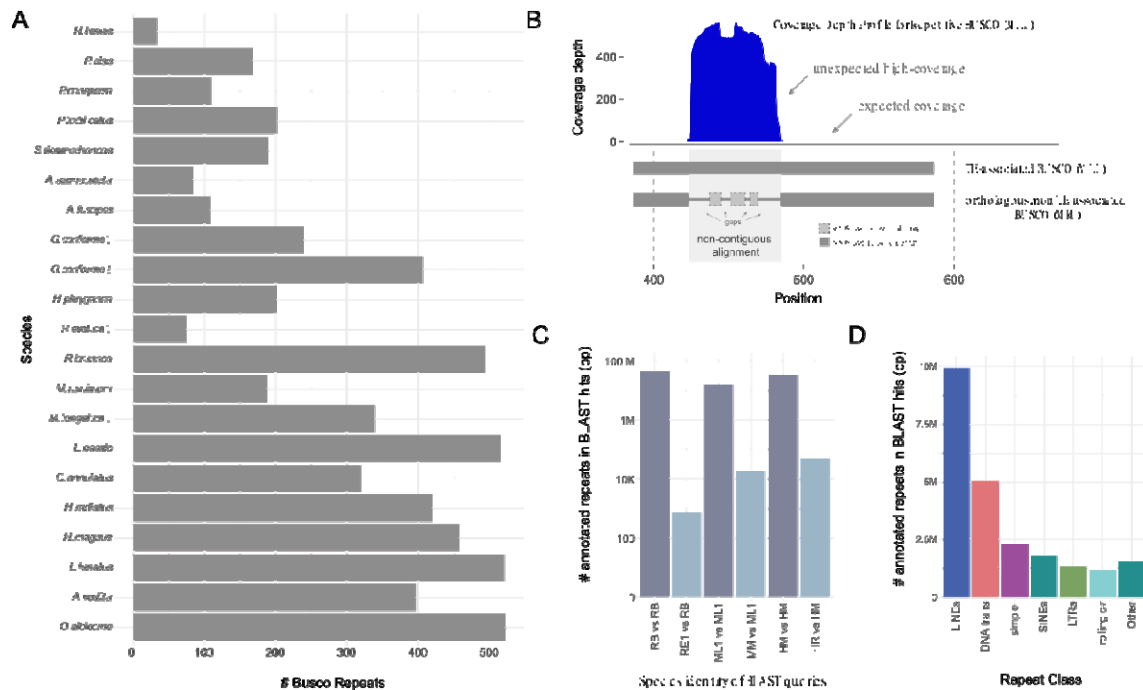

641 **Fig. 4: TE-BUSCO-gene associations in Trichoptera species.** (A) Raw abundance of TE-associated  
 642 BUSCO sequences present in the assembly of 2442BUSCOs in the OrthoDB 9 Endopterygota dataset.  
 643 (B) Upper plot: An example of a coverage depth profile of a TE-associated BUSCO gene [BUSCO  
 644 EOG090R02Q9 from ML1 ('inflated species')] which shows unexpected high coverage in the second  
 645 exon putatively due to the presence of a RE-derived sequence fragment. Lower plot: A typifying  
 646 alignment between a TE-associated BUSCO and its orthologous BUSCO from a closely related  
 647 species ('reference species') that lack TE-association. The non-TE-associated orthologous BUSCO,  
 648 consistent with the presence of a RE-derived sequence fragment in the TE-associated BUSCO,  
 649 shows non-contiguous alignment in regions of inflated coverage in the TE-associated BUSCO,  
 650 consistent with the presence of a RE-derived sequence fragment in the TE-associated BUSCO that is  
 651 absent in the reference species. (C) Summary of total bases annotated as REs obtained from each of  
 652 two BLAST searches. First, when we used BLAST to compare an TE-associated BUSCOs against an  
 653 assembly for the same species BLAST hits included megabases of annotated repeats (dark plots).  
 654 Second, when non-TE-associated orthologs of the TE-associated BUSCOs in the first search are taken  
 655 from a close relative and compared against the inflated species using BLAST, there is a dramatic drop  
 656 in BLAST hits annotated as REs. Note log scale on the y-axis. (D) Summary of annotations for

657 BLAST hits for classified REs when TE-associated BUSCOs are compared against an assembly of the  
658 same species using BLAST.

659

660 **Data and materials availability:**

661 This project has been deposited at NCBI under BioProject ID: PRJNA558902.

662 The data sets supporting the results of this article are available in the supplementary, data files

663 S1 and S2 and at <https://byu.box.com/v/trich-genomes>. The data available at the link will be

664 uploaded to GigaDB when the paper is accepted.

665

666 **Declarations**

667

668 **Consent for publication:** Not applicable

669 **Competing interests:** Authors declare that they have no competing interests.

670

671 **Funding**

672 This work is a result of the LOEWE-Centre for Translational Biodiversity Genomics funded

673 by the Hessen State Ministry of Higher Education, Research and the Arts (HMWK) that

674 supported JH and SUP, as well as internal funds of Senckenberg Research Institute provided

675 to JP. JSS was supported by an NSF Postdoctoral Research Fellowship in Biology (DBI-

676 1811930) and an NIH General Medical Sciences award (R35GM119515) to AML.

677 Sequencing was, in part, supported by BYU start-up funds to PBF and funds from the Army

678 Research Office, Life Science Division (Award no. W911NF-13-1-0319) to RJS.

679

680 **Author's contributions:**

681 Conceptualization –JH, JSS, PBF, SUP

682 Data curation – JH

683 Formal Analysis - JH, JM, JP, JSS, PBF, ZL

684 Funding acquisition – AML, PBF, SUP, RJS, RJS  
685 Investigation – JH, JP, JSS, PBF, ZL  
686 Methodology – AML, JSS, JP, JVS, PBF  
687 Project administration – SUP  
688 Resources – JP, MB, PBF, SUP  
689 Visualization - JH, JSS  
690 Writing – original draft – JH, JSS, PBF, ZL  
691 Writing – review & editing – AML, JH, JM, JP, JSS, JVS, MB, PBF, RJS, RJS, SUP, ZL

692

### 693 **Acknowledgments**

694 The authors thank Ralph Holzenthal for providing illustrations of larval Trichoptera and  
695 the structures they build. We thank Bob Wisseman for collecting *Himalopsyche phryganeae*.  
696 We thank both reviewers for their insightful critiques and interest in our manuscript.

697

### 698 **References**

- 699 1. Cornette R, Gusev O, Nakahara Y, Shimura S, Kikawada T, Okuda T. Chironomid midges (Diptera,  
700 chironomidae) show extremely small genome sizes. *Zoolog Sci.* 2015; doi: 10.2108/zs140166.
- 701 2. Westerman M, Barton NH, Hewitt GM. Differences in DNA content between two chromosomal  
702 races of the grasshopper *Podisma pedestris*. *Heredity.* Nature Publishing Group; 1987; doi:  
703 10.1038/hdy.1987.36.
- 704 3. Thomas CA. The genetic organization of chromosomes. *Annu Rev Genet.* Annual Reviews; 1971;  
705 doi: 10.1146/annurev.ge.05.120171.001321.
- 706 4. Bernard J. The Eukaryote Genome in Development and Evolution. Springer Netherlands;
- 707 5. GREGORY TR. The C-value Enigma in Plants and Animals: A Review of Parallels and an Appeal for  
708 Partnership. *Ann Bot.* 2005; doi: 10.1093/aob/mci009.
- 709 6. Elliott TA, Gregory TR. What's in a genome? The C-value enigma and the evolution of eukaryotic  
710 genome content. *Philos Trans R Soc B Biol Sci.* Royal Society; 2015; doi: 10.1098/rstb.2014.0331.
- 711 7. Abdel-Haleem H. The Origins of Genome Architecture. *J Hered.* 2007; doi: 10.1093/jhered/esm073.
- 712 8. Blommaert J. Genome size evolution: towards new model systems for old questions. *Proc R Soc B*  
713 *Biol Sci.* Royal Society; 2020; doi: 10.1098/rspb.2020.1441.

- 714 9. Canapa A, Barucca M, Biscotti MA, Forconi M, Olmo E. Transposons, Genome Size, and  
715 Evolutionary Insights in Animals. *Cytogenet Genome Res.* 2015; doi: 10.1159/000444429.
- 716 10. Petrov DA. Evolution of genome size: new approaches to an old problem. *Trends Genet TIG.* 2001;  
717 doi: 10.1016/s0168-9525(00)02157-0.
- 718 11. Orr HA. "Why Polyploidy is Rarer in Animals Than in Plants" Revisited. *Am Nat.* The University of  
719 Chicago Press; 1990; doi: 10.1086/285130.
- 720 12. Otto SP, Whitton J. Polyploid Incidence and Evolution. *Annu Rev Genet.* 2000; doi:  
721 10.1146/annurev.genet.34.1.401.
- 722 13. Hallinan NM, Lindberg DR. Comparative analysis of chromosome counts infers three  
723 paleopolyploidies in the mollusca. *Genome Biol Evol.* 2011; doi: 10.1093/gbe/evr087.
- 724 14. Alexandrou MA, Swartz BA, Matzke NJ, Oakley TH. Genome duplication and multiple evolutionary  
725 origins of complex migratory behavior in Salmonidae. *Mol Phylogenet Evol.* 2013; doi:  
726 10.1016/j.ympev.2013.07.026.
- 727 15. Campbell MA, Hale MC, McKinney GJ, Nichols KM, Pearse DE. Long-Term Conservation of  
728 Ohnologs Through Partial Tetrasomy Following Whole-Genome Duplication in Salmonidae. *G3*  
729 *GenesGenomesGenetics.* 2019; doi: 10.1534/g3.119.400070.
- 730 16. Woods IG, Wilson C, Friedlander B, Chang P, Reyes DK, Nix R, et al.. The zebrafish gene map  
731 defines ancestral vertebrate chromosomes. *Genome Res.* 2005; doi: 10.1101/gr.4134305.
- 732 17. Berthelot C, Brunet F, Chalopin D, Juanchich A, Bernard M, Noël B, et al.. The rainbow trout  
733 genome provides novel insights into evolution after whole-genome duplication in vertebrates. *Nat*  
734 *Commun.* Nature Publishing Group; 2014; doi: 10.1038/ncomms4657.
- 735 18. Glasauer SMK, Neuhauss SCF. Whole-genome duplication in teleost fishes and its evolutionary  
736 consequences. *Mol Genet Genomics MGG.* 2014; doi: 10.1007/s00438-014-0889-2.
- 737 19. Clarke TH, Garb JE, Hayashi CY, Arensburger P, Ayoub NA. Spider Transcriptomes Identify Ancient  
738 Large-Scale Gene Duplication Event Potentially Important in Silk Gland Evolution. *Genome Biol Evol.*  
739 2015; doi: 10.1093/gbe/evv110.
- 740 20. Kenny NJ, Chan KW, Nong W, Qu Z, Maeso I, Yip HY, et al.. Ancestral whole-genome duplication in  
741 the marine chelicerate horseshoe crabs. *Heredity.* Nature Publishing Group; 2016; doi:  
742 10.1038/hdy.2015.89.
- 743 21. Schwager EE, Sharma PP, Clarke T, Leite DJ, Wierschin T, Pechmann M, et al.. The house spider  
744 genome reveals an ancient whole-genome duplication during arachnid evolution. *BMC Biol.* 2017;  
745 doi: 10.1186/s12915-017-0399-x.
- 746 22. Li Z, Tiley GP, Galuska SR, Reardon CR, Kidder TI, Rundell RJ, et al.. Multiple large-scale gene and  
747 genome duplications during the evolution of hexapods. *Proc Natl Acad Sci.* National Academy of  
748 Sciences; 2018; doi: 10.1073/pnas.1710791115.
- 749 23. Lynch M, Conery JS. The Origins of Genome Complexity. *Science.* American Association for the  
750 Advancement of Science; 2003; doi: 10.1126/science.1089370.
- 751 24. Petrov DA. Mutational Equilibrium Model of Genome Size Evolution. *Theor Popul Biol.* 2002; doi:  
752 10.1006/tubi.2002.1605.

- 753 25. Wicker T, Sabot F, Hua-Van A, Bennetzen JL, Capy P, Chalhoub B, et al.. A unified classification  
754 system for eukaryotic transposable elements. *Nat Rev Genet*. Nature Publishing Group; 2007; doi:  
755 10.1038/nrg2165.
- 756 26. Kelley JL, Peyton JT, Fiston-Lavier A-S, Teets NM, Yee M-C, Johnston JS, et al.. Compact genome of  
757 the Antarctic midge is likely an adaptation to an extreme environment. *Nat Commun*. Nature  
758 Publishing Group; 2014; doi: 10.1038/ncomms5611.
- 759 27. Wang X, Fang X, Yang P, Jiang X, Jiang F, Zhao D, et al.. The locust genome provides insight into  
760 swarm formation and long-distance flight. *Nat Commun*. Nature Publishing Group; 2014; doi:  
761 10.1038/ncomms3957.
- 762 28. Petersen M, Armisén D, Gibbs RA, Hering L, Khila A, Mayer G, et al.. Diversity and evolution of the  
763 transposable element repertoire in arthropods with particular reference to insects. *BMC Ecol Evol*.  
764 2019; doi: 10.1186/s12862-018-1324-9.
- 765 29. Gilbert C, Peccoud J, Cordaux R. Transposable Elements and the Evolution of Insects. *Annu Rev*  
766 *Entomol*. Annual Reviews; 2021; doi: 10.1146/annurev-ento-070720-074650.
- 767 30. Olsen LK, Heckenhauer J, Sproul JS, Dikow RB, Gonzalesz VL, Kweskin MP, et al.. De novo whole  
768 genome assemblies of *Agrypnia vestita* Walker, and *Hesperophylax magnus* Banks reveal substantial  
769 repetitive element expansion in tube case-making caddisflies (Insecta: Trichoptera). *Genome Biol*  
770 *Evol*. 2021; doi: 10.1093/gbe/evab013.
- 771 31. Montgomery E, Charlesworth B, Langley CH. A test for the role of natural selection in the  
772 stabilization of transposable element copy number in a population of *Drosophila melanogaster*.  
773 *Genet Res*. Cambridge University Press; 1987; doi: 10.1017/S0016672300026707.
- 774 32. Charlesworth B, Langley CH. Transposition of copia elements in *Drosophila*. *Nature*. Nature  
775 Publishing Group; 1988; doi: 10.1038/332021b0.
- 776 33. Charlesworth B, Langley CH. The Population Genetics of *Drosophila* Transposable Elements. *Annu*  
777 *Rev Genet*. 1989; doi: 10.1146/annurev.ge.23.120189.001343.
- 778 34. Montgomery EA, Huang SM, Langley CH, Judd BH. Chromosome rearrangement by ectopic  
779 recombination in *Drosophila melanogaster*: genome structure and evolution. *Genetics*. 1991; doi:  
780 10.1093/genetics/129.4.1085.
- 781 35. Mieczkowski PA, Lemoine FJ, Petes TD. Recombination between retrotransposons as a source of  
782 chromosome rearrangements in the yeast *Saccharomyces cerevisiae*. *DNA Repair*. 2006; doi:  
783 10.1016/j.dnarep.2006.05.027.
- 784 36. Ugarković Đ, Plohl M. Variation in satellite DNA profiles—causes and effects. *EMBO J*. John Wiley  
785 & Sons, Ltd; 2002; doi: 10.1093/emboj/cdf612.
- 786 37. Ferree PM, Barbash DA. Species-Specific Heterochromatin Prevents Mitotic Chromosome  
787 Segregation to Cause Hybrid Lethality in *Drosophila*. *PLOS Biol*. Public Library of Science; 2009; doi:  
788 10.1371/journal.pbio.1000234.
- 789 38. Gahan LJ, Gould F, Heckel DG. Identification of a Gene Associated with Bt Resistance in *Heliothis*  
790 *virescens*. *Science*. American Association for the Advancement of Science; 2001; doi:  
791 10.1126/science.1060949.

- 792 39. Chen S, Li X. Transposable elements are enriched within or in close proximity to xenobiotic-  
793 metabolizing cytochrome P450 genes. *BMC Evol Biol.* 2007; doi: 10.1186/1471-2148-7-46.
- 794 40. González J, Lenkov K, Lipatov M, Macpherson JM, Petrov DA. High Rate of Recent Transposable  
795 Element-Induced Adaptation in *Drosophila melanogaster*. *PLoS Biol.* Public Library of Science; 2008;  
796 doi: 10.1371/journal.pbio.0060251.
- 797 41. González J, Karasov TL, Messer PW, Petrov DA. Genome-Wide Patterns of Adaptation to  
798 Temperate Environments Associated with Transposable Elements in *Drosophila*. *PLoS Genet.* Public  
799 Library of Science; 2010; doi: 10.1371/journal.pgen.1000905.
- 800 42. Itokawa K, Komagata O, Kasai S, Okamura Y, Masada M, Tomita T. Genomic structures of  
801 Cyp9m10 in pyrethroid resistant and susceptible strains of *Culex quinquefasciatus*. *Insect Biochem*  
802 *Mol Biol.* 2010; doi: 10.1016/j.ibmb.2010.06.001.
- 803 43. Hof AE van't, Campagne P, Rigden DJ, Yung CJ, Lingley J, Quail MA, et al.. The industrial melanism  
804 mutation in British peppered moths is a transposable element. *Nature.* Nature Publishing Group;  
805 2016; doi: 10.1038/nature17951.
- 806 44. Feschotte C. Transposable elements and the evolution of regulatory networks. *Nat Rev Genet.*  
807 Nature Publishing Group; 2008; doi: 10.1038/nrg2337.
- 808 45. Ellison CE, Bachtrog D. Dosage Compensation via Transposable Element Mediated Rewiring of a  
809 Regulatory Network. *Science.* American Association for the Advancement of Science; 2013; doi:  
810 10.1126/science.1239552.
- 811 46. Santos ME, Braasch I, Boileau N, Meyer BS, Sauter L, Böhne A, et al.. The evolution of cichlid fish  
812 egg-spots is linked with a cis -regulatory change. *Nat Commun.* Nature Publishing Group; 2014; doi:  
813 10.1038/ncomms6149.
- 814 47. Alfsnes K, Leinaas HP, Hessen DO. Genome size in arthropods; different roles of phylogeny,  
815 habitat and life history in insects and crustaceans. *Ecol Evol.* 2017; doi:  
816 <https://doi.org/10.1002/ece3.3163>.
- 817 48. : Trichoptera World Checklist. <https://entweb.sites.clemson.edu/database/trichopt/> Accessed  
818 2021 May 8.
- 819 49. Wiggins GB, Mackay RJ. Some Relationships between Systematics and Trophic Ecology in Nearctic  
820 Aquatic Insects, with Special Reference to Trichoptera. *Ecology.* 1978; doi:  
821 <https://doi.org/10.2307/1938234>.
- 822 50. Mackay RJ, Wiggins GB. Ecological Diversity in Trichoptera. *Annu Rev Entomol.* 1979; doi:  
823 10.1146/annurev.en.24.010179.001153.
- 824 51. Gurevich A, Saveliev V, Vyahhi N, Tesler G. QUASt: Quality assessment tool for genome  
825 assemblies. *Bioinforma Oxf Engl.* 2013; doi: 10.1093/bioinformatics/btt086.
- 826 52. Simão F, Waterhouse R, Ioannidis P, Zdobnov E. BUSCO: Assessing genome assembly and  
827 annotation completeness with single-copy orthologs. *Bioinforma Oxf Engl.* 2015; doi:  
828 10.1093/bioinformatics/btv351.
- 829 53. Waterhouse RM, Seppey M, Simão FA, Manni M, Ioannidis P, Klioutchnikov G, et al.. BUSCO  
830 Applications from Quality Assessments to Gene Prediction and Phylogenomics. *Mol Biol Evol.* 2018;  
831 doi: 10.1093/molbev/msx319.



- 832 54. Laetsch DR, Blaxter ML. BlobTools: Interrogation of genome assemblies. *F1000Research*. 2017;  
833 doi: 10.12688/f1000research.12232.1.
- 834 55. Heckenhauer J, Frandsen PB, Gupta DK, Paule J, Prost S, Schell T, et al.. Annotated Draft Genomes  
835 of Two Caddisfly Species *Plectrocnemia conspersa* CURTIS and *Hydropsyche tenuis* NAVAS (Insecta:  
836 Trichoptera). *Genome Biol Evol*. 2019; doi: 10.1093/gbe/evz264.
- 837 56. Thomas JA, Frandsen PB, Prendini E, Zhou X, Holzenthal RW. A multigene phylogeny and timeline  
838 for Trichoptera (Insecta). *Syst Entomol*. 2020; doi: <https://doi.org/10.1111/syen.12422>.
- 839 57. Schell T, Feldmeyer B, Schmidt H, Greshake B, Tills O, Truebano M, et al.. An Annotated Draft  
840 Genome for *Radix auricularia* (Gastropoda, Mollusca). *Genome Biol Evol*. 2017; doi:  
841 10.1093/gbe/evx032.
- 842 58. Hanrahan SJ, Johnston JS. New genome size estimates of 134 species of arthropods. *Chromosome*  
843 *Res Int J Mol Supramol Evol Asp Chromosome Biol*. 2011; doi: 10.1007/s10577-011-9231-6.
- 844 59. Yu Y-S, Jin S, Cho N, Lim J, Kim C-H, Lee S-G, et al.. Genome Size Estimation of *Callipogon relictus*  
845 *Semenov* (Coleoptera: Cerambycidae), an Endangered Species and a Korea Natural Monument.  
846 *Insects*. Multidisciplinary Digital Publishing Institute; 2021; doi: 10.3390/insects12020111.
- 847 60. Hare EE, Johnston JS. Genome size determination using flow cytometry of propidium iodide-  
848 stained nuclei. *Methods Mol Biol Clifton NJ*. 2011; doi: 10.1007/978-1-61779-228-1\_1.
- 849 61. Austin CM, Tan MH, Harrison KA, Lee YP, Croft LJ, Sunnucks P, et al.. De novo genome assembly  
850 and annotation of Australia's largest freshwater fish, the Murray cod (*Maccullochella peelii*), from  
851 Illumina and Nanopore sequencing read. *GigaScience*. 2017; doi: 10.1093/gigascience/gix063.
- 852 62. Pflug JM, Holmes VR, Burrus C, Johnston JS, Maddison DR. Measuring Genome Sizes Using Read-  
853 Depth, k-mers, and Flow Cytometry: Methodological Comparisons in Beetles (Coleoptera). *G3*  
854 *GenesGenomesGenetics*. 2020; doi: 10.1534/g3.120.401028.
- 855 63. Benjamini Y, Speed TP. Summarizing and correcting the GC content bias in high-throughput  
856 sequencing. *Nucleic Acids Res*. 2012; doi: 10.1093/nar/gks001.
- 857 64. Ranallo-Benavidez TR, Jaron KS, Schatz MC. GenomeScope 2.0 and Smudgeplot for reference-free  
858 profiling of polyploid genomes. *Nat Commun*. 2020; doi: 10.1038/s41467-020-14998-3.
- 859 65. Bennett MD, Riley R. The duration of meiosis. *Proc R Soc Lond B Biol Sci*. Royal Society; 1971; doi:  
860 10.1098/rspb.1971.0066.
- 861 66. Cavalier-Smith T. Nuclear volume control by nucleoskeletal DNA, selection for cell volume and cell  
862 growth rate, and the solution of the DNA C-value paradox. *J Cell Sci*. 1978; doi: 10.1242/jcs.34.1.247.
- 863 67. Gregory TR, Hebert PDN. The Modulation of DNA Content: Proximate Causes and Ultimate  
864 Consequences. *Genome Res*. 1999; doi: 10.1101/gr.9.4.317.
- 865 68. CAVALIER-SMITH T. Economy, Speed and Size Matter: Evolutionary Forces Driving Nuclear  
866 Genome Miniaturization and Expansion. *Ann Bot*. 2005; doi: 10.1093/aob/mci010.
- 867 69. Thomas GWC, Dohmen E, Hughes DST, Murali SC, Poelchau M, Glastad K, et al.. Gene content  
868 evolution in the arthropods. *Genome Biol*. 2020; doi: 10.1186/s13059-019-1925-7.

- 869 70. Nakatani Y, McLysaght A. Macrosynteny analysis shows the absence of ancient whole-genome  
870 duplication in lepidopteran insects. *Proc Natl Acad Sci U S A*. 2019; doi: 10.1073/pnas.1817937116.
- 871 71. Li Z, Tiley GP, Rundell RJ, Barker MS. Reply to Nakatani and McLysaght: Analyzing deep  
872 duplication events. *Proc Natl Acad Sci*. National Academy of Sciences; 2019; doi:  
873 10.1073/pnas.1819227116.
- 874 72. Roelofs D, Zwaenepoel A, Sistermans T, Nap J, Kampfraath AA, Van de Peer Y, et al.. Multi-faceted  
875 analysis provides little evidence for recurrent whole-genome duplications during hexapod evolution.  
876 *BMC Biol*. 2020; doi: 10.1186/s12915-020-00789-1.
- 877 73. Lamichhane S, Catullo R, Keogh JS, Clulow S, Edwards SV, Ezaz T. A bird-like genome from a frog:  
878 Mechanisms of genome size reduction in the ornate burrowing frog, *Platyplectrum ornatum*. *Proc*  
879 *Natl Acad Sci*. National Academy of Sciences; 2021; doi: 10.1073/pnas.2011649118.
- 880 74. Capy P, Gasperi G, Biéumont C, Bazin C. Stress and transposable elements: co-evolution or useful  
881 parasites? *Heredity*. 2000; doi: 10.1046/j.1365-2540.2000.00751.x.
- 882 75. Pecinka A, Dinh HQ, Baubec T, Rosa M, Lettner N, Scheid OM. Epigenetic Regulation of Repetitive  
883 Elements Is Attenuated by Prolonged Heat Stress in Arabidopsis. *Plant Cell*. 2010; doi:  
884 10.1105/tpc.110.078493.
- 885 76. Tittel-Elmer M, Bucher E, Broger L, Mathieu O, Paszkowski J, Vaillant I. Stress-Induced Activation  
886 of Heterochromatic Transcription. *PLoS Genet*. Public Library of Science; 2010; doi:  
887 10.1371/journal.pgen.1001175.
- 888 77. Wiggins G. Larvae of the North American Caddisfly Genera (Trichoptera). Larvae North Am.  
889 Caddisfly Genera Trichoptera. University of Toronto Press;
- 890 78. Wiggins GB, Information CI for S and T, Museum RO. Caddisflies: The Underwater Architects.  
891 University of Toronto Press;
- 892 79. Dijkstra K-DB, Monaghan MT, Pauls SU. Freshwater biodiversity and aquatic insect diversification.  
893 *Annu Rev Entomol*. 2014; doi: 10.1146/annurev-ento-011613-161958.
- 894 80. Kordiš D, Lovšin N, Gubenšek F. Phylogenomic Analysis of the L1 Retrotransposons in  
895 Deuterostomia. *Syst Biol*. 2006; doi: 10.1080/10635150601052637.
- 896 81. Warren IA, Naville M, Chalopin D, Levin P, Berger CS, Galiana D, et al.. Evolutionary impact of  
897 transposable elements on genomic diversity and lineage-specific innovation in vertebrates.  
898 *Chromosome Res*. 2015; doi: 10.1007/s10577-015-9493-5.
- 899 82. Suh A, Churakov G, Ramakodi MP, Platt RN II, Jurka J, Kojima KK, et al.. Multiple Lineages of  
900 Ancient CR1 Retroposons Shaped the Early Genome Evolution of Amniotes. *Genome Biol Evol*. 2015;  
901 doi: 10.1093/gbe/evu256.
- 902 83. Grandi FC, An W. Non-LTR retrotransposons and microsatellites. *Mob Genet Elem*. Taylor &  
903 Francis; 2013; doi: 10.4161/mge.25674.
- 904 84. Mackay TFC. Transposable elements and fitness in *Drosophila melanogaster*. *Genome*. NRC  
905 Research Press Ottawa, Canada; 2011; doi: 10.1139/g89-046.

- 906 85. Pasyukova EG, Nuzhdin SV, Morozova TV, Mackay TFC. Accumulation of Transposable Elements in  
907 the Genome of *Drosophila melanogaster* is Associated with a Decrease in Fitness. *J Hered.* 2004; doi:  
908 10.1093/jhered/esh050.
- 909 86. Langley CH, Montgomery E, Hudson R, Kaplan N, Charlesworth B. On the role of unequal  
910 exchange in the containment of transposable element copy number. *Genet Res.* Cambridge  
911 University Press; 1988; doi: 10.1017/S0016672300027695.
- 912 87. Hollister JD, Gaut BS. Epigenetic silencing of transposable elements: A trade-off between reduced  
913 transposition and deleterious effects on neighboring gene expression. *Genome Res.* 2009; doi:  
914 10.1101/gr.091678.109.
- 915 88. Lee YCG, Karpen GH. Pervasive epigenetic effects of *Drosophila* euchromatic transposable  
916 elements impact their evolution. Nordborg M, editor. *eLife*. eLife Sciences Publications, Ltd; 2017;  
917 doi: 10.7554/eLife.25762.
- 918 89. Kraaijeveld K. Genome Size and Species Diversification. *Evol Biol.* 2010; doi: 10.1007/s11692-010-  
919 9093-4.
- 920 90. Cosby RL, Chang N-C, Feschotte C. Host–transposon interactions: conflict, cooperation, and  
921 cooption. *Genes Dev.* 2019; doi: 10.1101/gad.327312.119.
- 922 91. Hardie DC, Hebert PD. Genome-size evolution in fishes. *Can J Fish Aquat Sci.* NRC Research Press  
923 Ottawa, Canada; 2011; doi: 10.1139/f04-106.
- 924 92. Rees DJRJ, Dufresne FD, Glémet HG, Belzile CB. Amphipod genome sizes: first estimates for Arctic  
925 species reveal genomic giants. *Genome.* 2007; doi: 10.1139/G06-155.
- 926 93. Dufresne F, Jeffery N. A guided tour of large genome size in animals: what we know and where  
927 we are heading. *Chromosome Res.* 2011; doi: 10.1007/s10577-011-9248-x.
- 928 94. Lertzman-Lepofsky G, Mooers AØ, Greenberg DA. Ecological constraints associated with genome  
929 size across salamander lineages. *Proc R Soc B Biol Sci.* Royal Society; 2019; doi:  
930 10.1098/rspb.2019.1780.
- 931 95. Vinogradov AE. Larger genomes for molluskan land pioneers. *Genome.* 2000; doi: 10.1139/g99-  
932 063.
- 933 96. Hotaling S, Sproul JS, Heckenhauer J, Powell A, Larracuente AM, Pauls SU, et al.. Long-reads are  
934 revolutionizing 20 years of insect genome sequencing. *Genome Biol Evol.* 2021; doi:  
935 10.1093/gbe/evab138.
- 936 97. Miller SA, Dykes DD, Polesky HF. A simple salting out procedure for extracting DNA from human  
937 nucleated cells. *Nucleic Acids Res.* 16:12151988;
- 938 98. Ruan J, Li H. Fast and accurate long-read assembly with wtdbg2. *Nat Methods.* Nature Publishing  
939 Group; 2020; doi: 10.1038/s41592-019-0669-3.
- 940 99. Walker BJ, Abeel T, Shea T, Priest M, Abouelliel A, Sakthikumar S, et al.. Pilon: An Integrated Tool  
941 for Comprehensive Microbial Variant Detection and Genome Assembly Improvement. *PLOS ONE.*  
942 Public Library of Science; 2014; doi: 10.1371/journal.pone.0112963.

- 943 100. Zimin AV, Puiu D, Luo M-C, Zhu T, Koren S, Marçais G, et al.. Hybrid assembly of the large and  
944 highly repetitive genome of *Aegilops tauschii*, a progenitor of bread wheat, with the MaSuRCA mega-  
945 reads algorithm. *Genome Res.* 2017; doi: 10.1101/gr.213405.116.
- 946 101. Bankevich A, Nurk S, Antipov D, Gurevich AA, Dvorkin M, Kulikov AS, et al.. SPAdes: A New  
947 Genome Assembly Algorithm and Its Applications to Single-Cell Sequencing. *J Comput Biol.* 2012; doi:  
948 10.1089/cmb.2012.0021.
- 949 102. Cantarel BL, Korf I, Robb SMC, Parra G, Ross E, Moore B, et al.. MAKER: an easy-to-use  
950 annotation pipeline designed for emerging model organism genomes. *Genome Res.* 2008; doi:  
951 10.1101/gr.6743907.
- 952 103. Holt C, Yandell M. MAKER2: an annotation pipeline and genome-database management tool for  
953 second-generation genome projects. *BMC Bioinformatics.* 2011; doi: 10.1186/1471-2105-12-491.
- 954 104. Luo S, Tang M, Frandsen PB, Stewart RJ, Zhou X. The genome of an underwater architect, the  
955 caddisfly *Stenopsyche tienmushanensis* Hwang (Insecta: Trichoptera). *GigaScience.* 2018; doi:  
956 10.1093/gigascience/giy143.
- 957 105. Haas BJ, Salzberg SL, Zhu W, Pertea M, Allen JE, Orvis J, et al.. Automated eukaryotic gene  
958 structure annotation using EVIDENCEModeler and the Program to Assemble Spliced Alignments.  
959 *Genome Biol.* 2008; doi: 10.1186/gb-2008-9-1-r7.
- 960 106. Lowe TM, Chan PP. tRNAscan-SE On-line: integrating search and context for analysis of transfer  
961 RNA genes. *Nucleic Acids Res.* 2016; doi: 10.1093/nar/gkw413.
- 962 107. Camacho C, Coulouris G, Avagyan V, Ma N, Papadopoulos J, Bealer K, et al.. BLAST+: architecture  
963 and applications. *BMC Bioinformatics.* 2009; doi: 10.1186/1471-2105-10-421.
- 964 108. Götz S, García-Gómez JM, Terol J, Williams TD, Nagaraj SH, Nueda MJ, et al.. High-throughput  
965 functional annotation and data mining with the Blast2GO suite. *Nucleic Acids Res.* 2008; doi:  
966 10.1093/nar/gkn176.
- 967 109. Katoh K, Kuma K, Toh H, Miyata T. MAFFT version 5: improvement in accuracy of multiple  
968 sequence alignment. *Nucleic Acids Res.* 2005; doi: 10.1093/nar/gki198.
- 969 110. Kalyanamoorthy S, Minh BQ, Wong TKF, von Haeseler A, Jermini LS. ModelFinder: fast model  
970 selection for accurate phylogenetic estimates. *Nat Methods.* Nature Publishing Group; 2017; doi:  
971 10.1038/nmeth.4285.
- 972 111. Minh BQ, Schmidt HA, Chernomor O, Schrempf D, Woodhams MD, von Haeseler A, et al.. IQ-  
973 TREE 2: New Models and Efficient Methods for Phylogenetic Inference in the Genomic Era. *Mol Biol*  
974 *Evol.* 2020; doi: 10.1093/molbev/msaa015.
- 975 112. Hoang DT, Chernomor O, von Haeseler A, Minh BQ, Vinh LS. UFBoot2: Improving the Ultrafast  
976 Bootstrap Approximation. *Mol Biol Evol.* 2018; doi: 10.1093/molbev/msx281.
- 977 113. Zhang C, Rabiee M, Sayyari E, Mirarab S. ASTRAL-III: polynomial time species tree reconstruction  
978 from partially resolved gene trees. *BMC Bioinformatics.* 2018; doi: 10.1186/s12859-018-2129-y.
- 979 114. Otto F. DAPI staining of fixed cells for high-resolution flow cytometry of nuclear DNA. *Methods*  
980 *Cell Biol.* 1990; doi: 10.1016/s0091-679x(08)60516-6.

- 981 115. Dolezel J, Binarova P, Lucretti S. Analysis of Nuclear DNA content in plant cells by Flow  
982 cytometry. *Biol Plant*. 1989; doi: 10.1007/BF02907241.
- 983 116. Wickham H. ggplot2: Elegant Graphics for Data Analysis. 2nd ed. Springer International  
984 Publishing;
- 985 117. Flynn JM, Hubley R, Goubert C, Rosen J, Clark AG, Feschotte C, et al.. RepeatModeler2 for  
986 automated genomic discovery of transposable element families. *Proc Natl Acad Sci*. National  
987 Academy of Sciences; 2020; doi: 10.1073/pnas.1921046117.
- 988 118. Novák P, Neumann P, Pech J, Steinhaisl J, Macas J. RepeatExplorer: a Galaxy-based web server  
989 for genome-wide characterization of eukaryotic repetitive elements from next-generation sequence  
990 reads. *Bioinformatics*. 2013; doi: 10.1093/bioinformatics/btt054.
- 991 119. Novák P, Ávila Robledillo L, Koblížková A, Vrbová I, Neumann P, Macas J. TAREAN: a  
992 computational tool for identification and characterization of satellite DNA from unassembled short  
993 reads. *Nucleic Acids Res*. 2017; doi: 10.1093/nar/gkx257.
- 994 120. Goubert C, Modolo L, Vieira C, ValienteMoro C, Mavingui P, Boulesteix M. De Novo Assembly  
995 and Annotation of the Asian Tiger Mosquito (*Aedes albopictus*) Repeatome with dnaPipeTE from Raw  
996 Genomic Reads and Comparative Analysis with the Yellow Fever Mosquito (*Aedes aegypti*). *Genome  
997 Biol Evol*. 2015; doi: 10.1093/gbe/evv050.
- 998 121. Negm S, Greenberg A, Larracuent AM, Sproul JS. RepeatProfiler: a pipeline for visualization and  
999 comparative analysis of repetitive DNA profiles. *bioRxiv*. Cold Spring Harbor Laboratory; 2020; doi:  
1000 10.1101/2020.05.22.111252.
- 1001 122. Barker MS, Dlugosch KM, Dinh L, Challa RS, Kane NC, King MG, et al.. EvoPipes.net: Bioinformatic  
1002 Tools for Ecological and Evolutionary Genomics. *Evol Bioinforma*. SAGE Publications Ltd STM; 2010;  
1003 doi: 10.4137/EBO.S5861.
- 1004 123. Birney E, Clamp M, Durbin R. GeneWise and Genomewise. *Genome Res*. 2004; doi:  
1005 10.1101/gr.1865504.
- 1006 124. Yang Z. PAML 4: Phylogenetic Analysis by Maximum Likelihood. *Mol Biol Evol*. 2007; doi:  
1007 10.1093/molbev/msm088.
- 1008 125. Cui L, Wall PK, Leebens-Mack JH, Lindsay BG, Soltis DE, Doyle JJ, et al.. Widespread genome  
1009 duplications throughout the history of flowering plants. *Genome Res*. 2006; doi: 10.1101/gr.4825606.
- 1010 126. Benaglia T, Chauveau D, Hunter DR, Young DS. mixtools: An R Package for Analyzing Mixture  
1011 Models. *J Stat Softw*. 2009; doi: 10.18637/jss.v032.i06.
- 1012
- 1013

**Table 1. Comparison of assembly and annotation statistics of all available Trichoptera Genomes.** \*Assemblies produced in this study.

\*\*N<sub>Arthropoda</sub>=2442

| Species                                | Abbreviation | Accession number                       | Length (bp)   | N50 (kbp) | No. of scaffolds/contigs | BUSCOS**                                        |
|----------------------------------------|--------------|----------------------------------------|---------------|-----------|--------------------------|-------------------------------------------------|
| <i>Agapetus fuscipes</i> *             | AF           | JAGTXP000000000                        | 552,637,417   | 2.8       | 291,536                  | C:39.7% [S:39.2%,D:0.5%],F:35.8%,M:24.5%,n:2442 |
| <i>Agraylea sexmaculata</i> *          | AS           | JAGTTH000000000                        | 196,044,125   | 86        | 7,050                    | C:94.3% [S:89.8%,D:4.5%],F:2.3%,M:3.4%,n:2442   |
| <i>Agrypnia vestita</i> [30]           | AV           | JADDOH000000000                        | 1,352,945,503 | 111.8     | 25,541                   | C:87.3% [S:79.0%,D:8.3%],F:5.5%,M:7.2%,n:2442   |
| <i>Drusus annulatus</i> *              | DA           | JAGWCC000000000                        | 727,941,535   | 1,043.7   | 2,401                    | C:93.5% [S:93.0%,D:0.5%],F:3.3%,M:3.2%,n:2442   |
| <i>Glossosoma conforme</i> *           | GC1          | JAGTXR000000000                        | 568,249,599   | 2,212.1   | 653                      | C:88.9% [S:88.0%,D:0.9%],F:2.9%,M:8.2%,n:2442   |
| <i>Glossosoma conforme</i> [124]       | GC2          | GCA_003347265.1                        | 604,293,666   | 17.1      | 119,821                  | C:74.2% [S:73.5%,D:0.7%],F:17.9%,M:7.9%,n:2442  |
| <i>Glyptotaelius pellucidula</i> [125] | GP           | Glyptotaelius_pellucidus_k51_scaffolds | 623,431,006   | 1.6       | 461,749                  | C:15.7% [S:15.7%,D:0.0%],F:31.4%,M:52.9%,n:2442 |
| <i>Halesus radiatus</i> *              | HR           | JAHDVE000000000                        | 973,356,502   | 125.2     | 12,484                   | C:85.7% [S:83.3%,D:2.4%],F:4.9%,M:9.4%,n:2442   |
| <i>Himalopsyche phryganea</i> *        | HP           | JAGVSL000000000                        | 633,785,554   | 4,634     | 710                      | C:95.5% [S:94.8%,D:0.7%],F:2.3%,M:2.2%,n:2442   |
| <i>Hesperophylax magnus</i> [30]       | HM           | JADDOG000000000                        | 1,275,967,528 | 768.2     | 6,877                    | C:92.5% [S:85.9%,D:6.6%],F:2.7%,M:4.8%,n:2442   |
| <i>Hydropsyche tenuis</i> [57]         | HT           | GCA_009617725.1                        | 229,663,394   | 2,190.1   | 403                      | C:94.4% [S:93.5%,D:0.9%],F:3.2%,M:2.4%,n:2442   |

|                                       |     |                 |               |         |         |                                                 |
|---------------------------------------|-----|-----------------|---------------|---------|---------|-------------------------------------------------|
| <i>Lepidostoma basale</i> *           | LB  | JAGTTH000000000 | 769,208,668   | 1,052   | 1,621   | C:93.9% [S:92.8%,D:1.1%],F:3.1%,M:3.0%,n:2442   |
| <i>Limnephilus lunatus</i> [69]       | LL  | GCA_000648945.2 | 1,369,180,260 | 69.1    | 58,718  | C:79.3% [S:74.6%,D:4.7%],F:11.7%,M:9.0%,n:2442  |
| <i>Micrasema longulum</i> *           | ML2 | JAGXCS000000000 | 668,600,304   | 2.5     | 368,330 | C:78.6% [S:77.7%,D:0.9%],F:5.9%,M:15.5%,n:2442  |
| <i>Micrasema longulum</i> *           | ML1 | JAGVSM000000000 | 585,245,295   | 170.5   | 5,451   | C:38.2% [S:38.0%,D:0.2%],F:31.6%,M:30.2%,n:2442 |
| <i>Micrasema minimum</i> *            | MM  | JAGVSQ000000000 | 329,257,313   | 69.5    | 7,561   | C:55.4% [S:55.2%,D:0.2%],F:11.7%,M:32.9%,n:2442 |
| <i>Micropterna sequax</i> *           | MS  | JAGUCF000000000 | 778,692,278   | 7.9     | 144,286 | C:43.4% [S:42.0%,D:1.4%],F:25.5%,M:31.1%,n:2442 |
| <i>Odontocerum albicorne</i> *        | OA  | JAGTXQ000000000 | 1,305,984,461 | 266.4   | 9,303   | C:91.1% [S:90.1%,D:1.0%],F:4.8%,M:4.1%,n:2442   |
| <i>Parapysche elsis</i> *             | PE  | JAGVSN000000000 | 282,185,525   | 5,591.7 | 159     | C:95.0% [S:94.5%,D:0.5%],F:2.4%,M:2.6%,n:2442   |
| <i>Philopotamus ludificatus</i> *     | PL  | JAGXCT000000000 | 360,300,449   | 67.5    | 37,274  | C:91.0% [S:89.4%,D:1.6%],F:5.9%,M:3.1%,n:2442   |
| <i>Plectrocnemia conspersa</i> [57]   | PC  | GCA_009617715.1 | 396,695,105   | 869     | 1,614   | C:93.5% [S:92.6%,D:0.9%],F:4.3%,M:2.2%,n:2442   |
| <i>Rhyacophila brunnea</i> *          | RB  | JAGYXB000000000 | 1,086,872,538 | 1,030.6 | 2,125   | C:94.5% [S:91.6%,D:2.9%],F:2.8%,M:2.7%,n:2442   |
| <i>Rhyacophila evoluta</i> *          | RE2 | JAGVSQ000000000 | 565,830,460   | 9.9     | 114,057 | C:71.7% [S:71.3%,D:0.4%],F:20.5%,M:7.8%,n:2442  |
| <i>Rhyacophila evoluta</i> *          | RE1 | JAGVSO000000000 | 562,550,625   | 9.7     | 111,706 | C:71.7% [S:71.4%,D:0.3%],F:20.6%,M:7.7%,n:2442  |
| <i>Sericostoma sp.</i> [126]          | SS  | GCA_003003475.1 | 1,015,727,762 | 3.2     | 561,698 | C:26.4% [S:26.4%,D:0.0%],F:34.4%,M:39.2%,n:2442 |
| <i>Stenopsyche tienhuanesis</i> [100] | ST  | GCA_008973525.1 | 451,494,475   | 1,296.7 | 552     | C:94.2% [S:90.8%,D:3.4%],F:3.4%,M:2.4%,n:2442   |
